# Supplementary material
Source: publisher figshare collection journal article supplement (https://gsapubs.figshare.com/ndownloader/files/22409778)
Supplement: Supplementary file 1 [file 22409778]

## Sheet: Sample Localities
Colgan, J.P., and Stanley, R.G., 2016, The Point Sal–Point Piedras Blancas correlation and the problem of slip on the San Gregorio–Hosgri fault, central California Coast Ranges: Geosphere, v. 12, doi:10.1130/GES01289.1.
Sample	Lat	Long	Unit
JC11-CA01	35.5382	-121.017	Lospe Fm(?), Hwy 46 near Cambria
VL200	35.5385	-121.016	Vaqueros Fm, Hwy 46 near Cambria
JC11-CA03	35.7195	-121.312	Lospe Fm, Piedras Blancas
JC11-CA05	35.7334	-121.314	Lospe Fm, Piedras Blancas
JC11-CA06	34.9157	-120.623	Lospe Fm, Brown's road, Point Sal
JC11-CA07	34.8806	-120.638	Base Lospe Fm, North Beach, Point Sal
JC11-CA08	34.8824	-120.638	Lospe Fm, North Beach, Point Sal
JC11-CA09	34.889	-120.638	Top Lospe "cannonball sand," North Beach, Point Sal

## Sheet: CA06
			Total				204Pb-corrected									207Pb-corrected		204Pb-corrected			Preferred Age
Spot Name	U (ppm)	Th (ppm)	238U/206Pb	% err	207Pb/206Pb	% err	238U/206Pb*	% err	207Pb*/206Pb*	% err	207Pb*/235U	% err	206Pb*/238U	% err	err corr	206Pb/238U Age (Ma)	± 1s	206Pb/207Pb Age (Ma)	± 1s	% discordant	Age (Ma)	± 1s	Y (ppm)	La (ppm)	Ce (ppm)	Sm (ppm)	Eu (ppm)	Gd (ppm)	Yb (ppm)	Hf (ppm)
CA06-75.1	152.297	96.7474	84.3213	3.38007	0.0534544	5.67106	86.1756	3.61091	0.0361459	29.5414	0.0578331	29.7612	0.0116042	3.61091	0.121329	75.4373	2.55621	-621.058	806.657	112.634	75.4373	2.55621	583.728	0.0186614	16.2153	2.02952	0.949754	16.6895	191.919	8436.73
CA06-68.1	2257.75	337.204	78.3433	2.91211	0.0485812	1.51745	78.3809	2.9125	0.0482004	1.7222	0.0847895	3.38358	0.0127582	2.9125	0.860775	81.6697	2.36938	108.091	40.6772	24.5476	81.6697	2.36938	3510.49	0.172345	30.6998	1.32639	0.508613	31.469	1445.17	15139.7
CA06-73.1	547.754	548.474	76.8728	2.3997	0.0515905	2.86673	77.2835	2.41945	0.0473733	6.04621	0.0845178	6.51233	0.0129394	2.41945	0.371518	82.9105	1.98703	67.05	143.907	-23.7576	82.9105	1.98703	1745.05	0.113103	47.4692	10.4101	3.95112	69.7701	505.547	10061.9
CA06-8.1	364.431	183.049	75.31	1.23429	0.0497226	4.85581	75.5776	1.28441	0.0469106	7.929	0.0855814	8.03236	0.0132314	1.28441	0.159905	84.8228	1.07369	43.6388	189.552	-94.7965	84.8228	1.07369	548.098	0.0125442	35.9548	1.31309	0.6763	12.2772	214.323	11999.1
CA06-77.1	85.3583	60.878	74.5834	6.32236	0.045461	8.29174	72.7629	6.55401	0.0648844	21.4279	0.122951	22.4078	0.0137433	6.55401	0.292487	86.1046	5.4346	769.674	451.169	89.1628	86.1046	5.4346	776.59	0.044641	21.115	3.82902	1.98344	28.6996	199.545	8252.61
CA06-24.1	1426.01	421.642	70.6666	1.80858	0.04667	5.43308	70.6666	1.80858	0.04667	5.43308	0.0910595	5.7262	0.014151	1.80858	0.315843	90.717	1.65815	31.3304	130.186	-190.457	90.717	1.65815	1332.39	0.0163409	40.0456	3.10548	0.966982	32.8905	407.924	15449.8
CA06-78.1	339.167	113.123	70.5033	2.42048	0.0465663	3.67076	70.693	2.43538	0.0444278	6.1789	0.0866523	6.64153	0.0141457	2.43538	0.36669	90.9379	2.19934	-87.99	151.47	204.344	90.9379	2.19934	381.536	0.0199924	8.84491	0.659896	0.185565	6.37981	166.467	11075.6
CA06-47.1	321.283	86.3454	68.4606	2.0306	0.0484707	4.64063	68.4606	2.0306	0.0484707	4.64063	0.0976203	5.06545	0.014607	2.0306	0.400872	93.4149	1.90598	121.281	109.34	23.0881	93.4149	1.90598	668.845	0.0148177	16.8942	1.50675	0.498746	15.4529	234.379	10795.4
CA06-19.1	138.637	50.9438	68.5764	1.44006	0.0454601	7.94167	69.1708	1.68083	0.0385584	20.3771	0.0768596	20.4464	0.014457	1.68083	0.0822069	93.6101	1.4064	-447.812	536.69	121.543	93.6101	1.4064	656.088	0.0320795	16.7936	1.73829	0.82236	14.0837	248.416	8794.32
CA06-72.1	246.64	120.771	68.0019	2.89973	0.0480342	4.22958	68.2502	2.92264	0.045135	7.87277	0.0911822	8.39776	0.014652	2.92264	0.348027	94.0934	2.72566	-49.4233	191.567	291.843	94.0934	2.72566	713.159	0.0250677	16.3698	2.02304	1.07825	18.2273	301.101	11810.2
CA06-51.1	837.095	227.54	67.9223	3.63081	0.0464948	2.93114	67.8376	3.63296	0.0474872	3.54572	0.0965177	5.07646	0.0147411	3.63296	0.715647	94.3849	3.41391	72.7613	84.3019	-29.8656	94.3849	3.41391	348.646	0.00760912	14.877	0.555233	0.320532	5.54299	167.235	12454.1
CA06-14.1	378.916	171.368	67.5153	2.36343	0.046474	4.0775	67.6791	2.37585	0.044545	6.08533	0.0907498	6.53268	0.0147756	2.37585	0.363686	94.9535	2.2444	-81.5406	148.991	217.553	94.9535	2.2444	416.298	0.0515945	24.0434	1.21327	0.524651	11.5701	143.596	10744.3
CA06-30.1	685.176	291.183	67.1279	1.39492	0.0479123	3.29868	67.4521	1.42252	0.0440783	6.20059	0.0901013	6.36167	0.0148253	1.42252	0.223607	95.327	1.33655	-107.387	152.574	189.74	95.327	1.33655	637.874	0.0151907	27.3348	1.62356	0.405492	14.743	239.466	11840.2
CA06-69.1	325.141	106.115	67.1533	3.0664	0.0467162	7.56633	67.1533	3.0664	0.0467162	7.56633	0.0959183	8.16408	0.0148913	3.0664	0.375596	95.434	2.94231	33.6997	181.221	-184.112	95.434	2.94231	508.75	0.0265597	23.4673	0.79332	0.378143	7.53384	270.025	12505.6
CA06-13.1	942.451	64.115	66.1384	2.79065	0.0465826	2.89801	66.1384	2.79065	0.0465826	2.89801	0.0971118	4.02321	0.0151198	2.79065	0.693639	96.9073	2.6957	26.8386	69.5004	-262.41	96.9073	2.6957	59.2904	0.00577925	1.22228	1.34937	0.226479	8.64511	10.5689	13917.5
CA06-56.1	566.369	177.116	64.7388	1.17052	0.0528214	3.28259	64.8506	1.18318	0.0514588	4.29289	0.109408	4.45296	0.0154201	1.18318	0.265707	98.219	1.16378	260.436	98.6038	62.5975	98.219	1.16378	1082.55	0.00555427	15.1817	1.90139	0.170318	20.435	411.995	12854.7
CA06-46.1	138.246	54.2202	64.5891	4.83856	0.0523894	6.85625	63.6594	4.9445	0.0637566	13.612	0.138091	14.4823	0.0157086	4.9445	0.341418	98.4991	4.76246	732.643	288.328	86.9488	98.4991	4.76246	448.543	0.053258	10.619	1.17165	0.441959	9.83477	164.992	10171.6
CA06-10.1	822.774	7.53653	64.9124	1.86302	0.0475032	2.92847	64.9124	1.86302	0.0475032	2.92847	0.100901	3.47085	0.0154054	1.86302	0.536763	98.6144	1.83585	73.5617	69.616	-34.2328	98.6144	1.83585	297.896	0.0182235	0.699258	0.139714	0.057488	3.94292	46.7956	14238.5
CA06-34.1	706.318	733.73	64.3442	3.86148	0.0478316	3.16374	64.157	3.86695	0.0501418	4.42816	0.10776	5.87893	0.0155868	3.86695	0.657764	99.4398	3.82466	200.563	102.822	50.677	99.4398	3.82466	4302.07	0.201358	32.4921	23.2814	5.53004	182.105	1047.16	8147.22
CA06-45.1	180.066	75.6575	64.3645	1.35854	0.0434837	6.60243	63.281	1.67052	0.0569281	14.2959	0.124038	14.3932	0.0158025	1.67052	0.116064	99.9499	1.3973	487.788	315.471	79.8962	99.9499	1.3973	598.039	0.016835	9.6546	1.39493	0.295829	14.7515	197.308	10862.8
CA06-79.1	174.977	61.2024	63.3272	3.173	0.0470488	5.07971	63.975	3.25444	0.0389149	16.1724	0.0838701	16.4966	0.0156311	3.25444	0.19728	101.127	3.20622	-423.634	423.838	124.576	101.127	3.20622	575.523	0.0178937	13.3028	0.801403	0.254106	10.1638	225.409	10573.5
CA06-54.1	397.057	270.431	62.3346	1.87242	0.0488532	4.01931	62.6343	1.90305	0.0450374	7.44537	0.0991431	7.68473	0.0159657	1.90305	0.24764	102.497	1.92557	-54.6903	181.35	288.989	102.497	1.92557	1203.35	0.00592821	18.5763	3.17321	0.439073	28.9839	342.675	10313
CA06-1.1	189.625	117.745	61.937	1.34053	0.0511251	14.0984	62.5925	1.53536	0.0427507	22.0526	0.094172	22.106	0.0159763	1.53536	0.0694543	102.858	1.6582	-183.198	550.723	157.021	102.858	1.6582	1146.36	0.0138146	25.514	2.35692	1.55471	24.5892	384.928	7389.97
CA06-11.1	362.473	177.253	61.8071	2.58209	0.0450438	4.35668	61.9718	2.59581	0.0429183	6.75852	0.0954881	7.23988	0.0161364	2.59581	0.358543	103.861	2.67943	-173.436	168.458	160.787	103.861	2.67943	816.532	0.018234	13.4934	2.41416	0.491707	22.9814	247.891	9735.15
CA06-29.1	426.062	230.906	61.166	2.19322	0.0442294	4.23626	61.0164	2.20681	0.0461811	5.84432	0.104356	6.24709	0.016389	2.20681	0.353254	105.05	2.30452	6.03634	140.712	-1649.42	105.05	2.30452	1335.48	0.0205476	13.3437	3.61068	0.751445	32.1885	422.281	10637.4
CA06-20.1	190.118	65.7473	60.9772	2.69273	0.0438002	6.22317	60.9772	2.69273	0.0438002	6.22317	0.0990399	6.78076	0.0163996	2.69273	0.397113	105.43	2.84601	-122.986	153.594	186.782	105.43	2.84601	404.171	0.0170241	7.09744	0.84755	0.287052	9.15145	128.977	10395.3
CA06-49.1	434.263	315.633	60.2503	2.08251	0.0504166	3.70809	60.3802	2.09364	0.0487092	5.20922	0.111229	5.61421	0.0165617	2.09364	0.372918	105.816	2.20557	132.832	122.475	20.4504	105.816	2.20557	2112.53	0.068575	23.1199	8.05183	0.60348	64.8181	470.503	10277.3
CA06-2.1	163.771	67.2632	58.1432	1.39684	0.0553114	5.93256	57.8014	1.51554	0.0599409	9.4116	0.142984	9.53284	0.0173006	1.51554	0.158981	108.956	1.57926	600.498	203.752	82.2792	108.956	1.57926	298.426	0.0207555	12.2135	0.655299	0.32066	6.10025	131.786	11240.4
CA06-33.1	109.486	78.1567	58.5051	3.10195	0.0495516	7.77998	59.039	3.23342	0.0423133	19.56	0.0988188	19.8254	0.0169379	3.23342	0.163095	109.073	3.40532	-208.942	490.957	153.11	109.073	3.40532	909.192	0.0305394	18.2975	3.17852	1.0849	28.2748	283.697	10239.6
CA06-60.1	832.106	347.532	57.6038	1.93251	0.0493252	2.6808	57.6671	1.93563	0.0484527	3.27326	0.115849	3.80275	0.0173409	1.93563	0.509009	110.801	2.13686	120.404	77.1358	8.02151	110.801	2.13686	1880.61	0.166118	44.1387	2.54983	1.24735	34.3956	660.85	11253.4
CA06-25.1	707.884	236.473	57.4606	2.73853	0.0476619	6.1317	57.5384	2.74188	0.0465846	6.69525	0.111631	7.23494	0.0173797	2.74188	0.378977	111.307	3.05779	26.9407	160.563	-314.996	111.307	3.05779	280.116	0.00873465	16.2082	0.517098	0.299316	5.73316	156.253	13420.7
CA06-52.1	77.645	37.2954	56.1945	2.78051	0.0553626	8.61238	56.8914	3.04463	0.0455947	24.1384	0.110502	24.3297	0.0175774	3.04463	0.125141	112.705	3.18848	-24.8245	584.598	557.327	112.705	3.18848	399.361	0.0208435	13.7502	0.84167	0.305367	9.37435	153.576	10636.1
CA06-59.1	155.75	94.1823	55.5641	2.29119	0.0514388	5.97934	55.2547	2.35792	0.0558479	9.57277	0.13936	9.85889	0.018098	2.35792	0.239167	114.54	2.64604	445.36	212.798	74.6983	114.54	2.64604	1270.6	0.00828314	15.8662	3.55442	0.767603	33.5785	365.942	11966.3
CA06-64.1	329.908	176.163	54.6909	2.42739	0.0482471	3.6018	54.5469	2.44163	0.0503404	5.39043	0.127247	5.91763	0.0183328	2.44163	0.412602	116.824	2.83007	209.731	124.957	44.5628	116.824	2.83007	780.312	0.0311582	20.3082	1.78599	0.202293	17.8668	225.407	11102.1
CA06-55.1	81.799	39.6345	52.3537	3.89962	0.0564396	19.2594	52.3537	3.89962	0.0564396	19.2594	0.148641	19.6503	0.0191008	3.89962	0.198451	120.758	4.96456	468.74	426.4	74.6748	120.758	4.96456	409.563	0.0137549	14.9517	1.28703	0.482804	10.4123	140.085	9673.36
CA06-42.1	126.252	37.5053	50.2797	4.00134	0.0512227	6.33021	50.5898	4.04861	0.0463338	12.7401	0.12628	13.3679	0.0197668	4.04861	0.302859	126.535	5.05629	13.9779	306.279	-810.63	126.535	5.05629	516.528	0.0169964	5.33637	0.761487	0.228748	7.78268	255.385	10636.8
CA06-70.1	83.6426	70.5081	46.1228	3.38723	0.053355	6.00146	46.1228	3.38723	0.053355	6.00146	0.1595	6.89136	0.0216813	3.38723	0.491518	137.491	4.65712	342.936	135.829	60.3187	137.491	4.65712	592.251	0.0409152	26.9066	1.10603	0.438852	12.4517	227.42	8312.54
CA06-62.1	77.7573	31.6743	45.5974	1.68275	0.047652	8.12579	46.9332	2.38635	0.0242993	59.441	0.0713863	59.4889	0.0213069	2.38635	0.0401142	140.059	2.43543				140.059	2.43543	415.001	0.0220594	13.6547	0.922749	0.218357	9.20094	151.792	10818.8
CA06-57.1	423.501	200.705	45.3535	1.65152	0.0494902	3.48067	45.6076	1.68291	0.0450337	6.91461	0.136145	7.11646	0.0219262	1.68291	0.236482	140.484	2.32312	-54.8941	168.429	358.585	140.484	2.32312	1051.51	0.00548097	33.4306	2.05471	0.748009	18.1813	447.068	10541.1
CA06-71.1	562.979	289.758	45.1702	3.10918	0.0492672	2.2431	45.2167	3.11088	0.048449	2.84104	0.147736	4.21297	0.0221157	3.11088	0.738405	141.089	4.3593	120.224	66.9526	-17.4819	141.089	4.3593	1203.01	0.0405235	25.6654	2.35107	0.872155	24.1429	505.121	9965.14
CA06-22.1	78.7233	34.7558	44.2831	3.31561	0.0469785	8.18456	44.2831	3.31561	0.0469785	8.18456	0.146272	8.83065	0.022582	3.31561	0.375466	144.305	4.79909	47.0944	195.534	-207.98	144.305	4.79909	391.521	0.0120168	11.3723	1.1998	0.430414	10.297	130.169	9449.53
CA06-81.1	152.33	76.9061	44.3006	2.87266	0.0463183	4.73986	44.4908	2.90458	0.0428885	9.53668	0.132914	9.9692	0.0224765	2.90458	0.291356	144.367	4.13529	-175.168	237.785	183.845	144.367	4.13529	353.958	0.0221052	11.4419	0.482308	0.318779	6.2018	184.695	9437.3
CA06-9.1	108.029	71.707	44.0551	1.52098	0.0433426	7.01161	43.7786	1.64539	0.0483746	12.0766	0.152355	12.1882	0.0228422	1.64539	0.134999	145.703	2.26682	116.604	284.791	-25.1433	145.703	2.26682	914.046	0.00863597	15.4191	4.80985	1.24428	33.5453	257.724	9968.64
CA06-50.1	229.023	137.748	43.3307	1.82693	0.051886	8.81487	43.2027	1.85067	0.0542299	9.44897	0.173073	9.6285	0.0231467	1.85067	0.192207	146.553	2.7865	379.629	212.473	61.841	146.553	2.7865	1622.55	0.0255666	20.3061	4.8529	1.76212	44.8364	505.333	9372.3
CA06-16.1	175.202	73.3133	43.203	2.47626	0.0525171	4.99768	43.915	2.60983	0.0394528	18.1409	0.12387	18.3276	0.0227713	2.60983	0.142398	146.868	3.64159	-387.787	471.961	139.004	146.868	3.64159	957.617	0.0241408	21.8118	2.60702	0.93935	22.2816	340.718	8836.93
CA06-58.1	104.332	63.1615	43.3704	1.51358	0.0486046	15.4048	44.2483	1.91241	0.0324798	37.5335	0.101209	37.5822	0.0225997	1.91241	0.050886	147.021	2.59969	-922.623	1093.81	116.947	147.021	2.59969	1215.13	0.0353821	15.4031	5.90644	1.32609	40.0479	328.842	9639.98
CA06-23.1	133.455	47.5175	43.3447	1.45488	0.0481177	5.97455	43.802	1.63506	0.0397073	16.8128	0.124991	16.8921	0.02283	1.63506	0.096794	147.197	2.18972	-371.092	435.928	140.812	147.197	2.18972	532.271	0.00878631	14.6995	1.17473	0.237464	11.5525	194.003	12121.2
CA06-35.1	94.1392	34.8499	40.3957	1.55813	0.0488823	6.80166	40.3957	1.55813	0.0488823	6.80166	0.166847	6.97785	0.0247551	1.55813	0.223297	157.706	2.52332	141.167	159.669	-11.8118	157.706	2.52332	935.938	0.0105183	4.41512	2.30236	0.943446	17.5569	439.147	10069.7
CA06-41.1	227.66	86.0045	39.3375	2.18705	0.0466013	4.37164	39.2302	2.20399	0.0487826	6.10189	0.171453	6.48773	0.0254906	2.20399	0.339717	162.373	3.54557	136.374	143.369	-19.2239	162.373	3.54557	535.965	0.0137357	11.0211	1.09781	0.370448	11.6359	228.465	10500.9
CA06-32.1	88.5389	35.9387	39.168	1.58814	0.044901	7.13384	38.8963	1.73306	0.0504606	12.6283	0.178873	12.7467	0.0257094	1.73306	0.135962	163.413	2.65386	215.259	292.446	24.2858	163.413	2.65386	338.994	0.0223236	7.42379	0.774325	0.301372	7.00039	138.644	9317.24
CA06-74.1	114.203	34.4633	39.092	7.1396	0.0445223	10.1757	39.092	7.1396	0.0445223	10.1757	0.157033	12.4306	0.0255807	7.1396	0.574357	163.805	11.6337	-82.7887	249.199	300.468	163.805	11.6337	282.147	0.0148165	9.46058	0.454337	0.281732	4.79499	142.098	11665.5
CA06-7.1	208.321	139.238	38.1701	2.34658	0.0525723	12.8013	38.1701	2.34658	0.0525723	12.8013	0.189905	13.0146	0.0261985	2.34658	0.180304	166.058	4.10808	309.393	291.461	46.7131	166.058	4.10808	1678.73	0.14827	11.0574	4.90335	1.0184	39.9934	535.64	9364.29
CA06-53.1	239.415	128.065	38.0821	2.77841	0.0472724	3.98132	37.9942	2.78799	0.0491178	5.35408	0.178247	6.03648	0.0263198	2.78799	0.461857	167.54	4.63178	152.438	125.425	-9.99241	167.54	4.63178	640.551	0.307055	25.1742	1.93056	0.503907	14.0303	258.095	9273.21
CA06-21.1	157.691	52.5259	37.4834	5.96831	0.0453107	5.36155	37.4834	5.96831	0.0453107	5.36155	0.166672	8.0229	0.0266785	5.96831	0.743909	170.607	10.107	-39.9749	130.226	531.556	170.607	10.107	623.259	0.0263739	2.20565	1.45696	0.0543115	16.5397	183.27	9432.58
CA06-48.1	472.299	49.205	33.2863	2.26841	0.0509476	2.75989	33.1697	2.27741	0.0537406	3.96729	0.22339	4.57449	0.030148	2.27741	0.49785	190.573	4.29424	359.214	89.5315	47.3901	190.573	4.29424	79.6406	0.0128663	3.55812	0.129057	0.0654743	1.2471	42.9134	9626.96
CA06-37.1	391.792	121.191	31.7527	2.42956	0.050427	2.89223	31.7527	2.42956	0.050427	2.89223	0.21897	3.77727	0.0314934	2.42956	0.643205	199.814	4.81925	213.717	66.997	6.57159	199.814	4.81925	573.706	0.0199297	15.8803	1.16315	0.797894	12.109	221.546	10253.3
CA06-4.1	82.9109	16.8803	29.0601	1.6393	0.0483111	5.99103	28.9084	1.72048	0.0524978	9.64497	0.250391	9.79722	0.034592	1.72048	0.175609	218.695	3.63073	306.16	219.725	28.88	218.695	3.63073	1324.14	0.00232828	5.99803	2.48468	0.782365	24.8704	535.648	10214.4
CA06-44.1	172.459	67.9505	27.2565	4.49598	0.0501383	4.08153	27.3965	4.51063	0.0460245	7.76783	0.23163	8.98248	0.036501	4.51063	0.502159	232.473	10.3473	-2.15071	187.315	11042.4	232.473	10.3473	3103.29	0.0137794	18.1421	4.94825	1.63514	66.2382	964.329	8257.7
CA06-36.1	433.306	135	25.3144	2.22302	0.0512381	2.46199	25.3382	2.225	0.0504873	2.91044	0.274731	3.6635	0.0394662	2.225	0.607342	249.747	5.49684	216.482	67.3848	-15.5604	249.747	5.49684	768.17	0.0602303	17.4048	0.902347	0.912205	10.1545	390.39	11489.5
CA06-15.1	112.12	48.7622	22.3403	2.7475	0.049195	4.57627	22.271	2.76498	0.0516941	6.4867	0.320039	7.05141	0.0449015	2.76498	0.392117	283.24	7.71336	270.905	148.713	-4.61749	283.24	7.71336	491.026	0.0113912	12.5625	1.00784	0.359989	10.2482	183.504	9982.68
CA06-40.1	22.658	7.93411	9.41209	2.52924	0.0589834	17.4686	9.53016	2.68034	0.0486693	26.2643	0.704136	26.4007	0.10493	2.68034	0.101525	652.745	17.9109	130.907	617.724	-411.49			67.9438	0.65528	6.73986	0.153372	0.0853375	1.22271	35.1398	7062.82
CA06-39.1	379.786	273.576	8.89236	2.35665	0.0610199	1.4436	8.88246	2.35753	0.0619365	1.65735	0.961424	2.8818	0.112581	2.35753	0.818076	688.118	15.7634	670.987	35.4619	-2.62959	688.118	15.7634	2647.18	0.0739594	27.9718	11.2922	0.535492	91.727	668.856	9660.02
CA06-18.1	515.689	288.159	8.79568	1.82749	0.0625797	1.19458	8.79795	1.82767	0.0623674	1.24637	0.977412	2.2122	0.113663	1.82767	0.826178	694.182	12.3319	685.803	26.6034	-1.25849	694.182	12.3319	1015.59	0.0260184	30.0503	3.43678	0.16491	29.2491	300.737	8696.94
CA06-83.1	346.504	262.047	5.44124	2.67919	0.0806058	0.785476	5.44221	2.67925	0.0804563	0.808708	2.03838	2.79864	0.183749	2.67925	0.95734	1081.54	27.9333	1207.34	15.9256	10.7907	1207.34	15.9256	2401.07	0.111563	43.8583	10.2597	0.352498	80.0486	697.961	8080.99
CA06-26.1	1547.45	30.5983	5.22975	6.00849	0.084453	3.43251	5.22975	6.00849	0.084453	3.43251	2.22657	6.91983	0.191214	6.00849	0.8683	1118.7	64.8628	1302.16	66.686	14.5778	1302.16	66.686	722.759	0.0252168	1.12471	0.580173	0.0400337	7.28512	527.077	19712.7
CA06-76.1	405.453	88.8756	4.7171	2.41391	0.0888475	0.664304	4.71774	2.41394	0.088734	0.677416	2.59333	2.50719	0.211966	2.41394	0.962807	1229.47	28.5978	1397.59	12.987	12.4459	1397.59	12.987	2797.53	0.0221812	2.76526	2.1256	0.0748811	34.2847	958.183	13486.4
CA06-5.1	1247.13	19.7817	4.61514	1.83456	0.0811182	0.493827	4.61514	1.83456	0.0811182	0.493827	2.42345	1.89987	0.216678	1.83456	0.965628	1266.75	22.3943	1223.45	9.70217	-3.67682	1223.45	9.70217	744.258	0.0117125	1.15886	0.264122	0.0549044	6.1842	457.046	13601.5
CA06-66.1	226.924	202.248	4.47953	2.81802	0.0890716	0.855281	4.47853	2.81811	0.0892594	0.878838	2.74802	2.95197	0.223287	2.81811	0.954656	1291.95	35.0956	1408.9	16.8224	8.59288	1408.9	16.8224	1292.89	0.0282516	14.618	3.68957	0.270025	32.589	408.796	10363
CA06-67.1	383.396	73.5372	4.47691	2.41282	0.0893773	1.32434	4.47691	2.41282	0.0893773	1.32434	2.75265	2.75238	0.223369	2.41282	0.876631	1292.23	30.091	1411.42	25.3412	8.74186	1411.42	25.3412	3067.53	0.031383	2.16942	2.43423	0.0540749	37.1605	994.227	12298.7
CA06-12.1	195.783	59.6928	4.42549	2.64813	0.0874112	1.19801	4.42403	2.64833	0.0876902	1.23543	2.73296	2.92232	0.226038	2.64833	0.906244	1309.63	33.455	1374.87	23.7591	4.91678	1374.87	23.7591	1932.57	0.0283647	3.34952	2.51902	0.0518183	31.6376	640.994	12994.3
CA06-63.1	413.079	56.6155	4.36951	2.41417	0.0904907	1.47165	4.3689	2.41421	0.0906101	1.47539	2.8596	2.82935	0.228891	2.41421	0.853276	1321.17	30.803	1437.59	28.1309	8.38078	1437.59	28.1309	2677	0.0224594	1.00672	1.91248	0.0324523	31.8113	908.143	12924.1
CA06-65.1	1802.86	129.331	4.26111	2.65209	0.0883344	0.322312	4.26138	2.65209	0.0882808	0.325377	2.85639	2.67198	0.234666	2.65209	0.992558	1356.89	34.6965	1387.77	6.24635	2.3063	1387.77	6.24635	2904.12	0.122869	2.75695	2.38522	0.103654	31.4251	1309.98	13450.5
CA06-27.1	955.291	75.9938	4.18895	1.73167	0.0880342	0.520071	4.18947	1.73169	0.0879273	0.527815	2.89378	1.81034	0.238694	1.73169	0.956554	1379.89	23.0555	1380.06	10.1434	0.0127956	1380.06	10.1434	2329.88	0.0747056	2.30145	1.7773	0.0428274	24.4257	1056.35	14962.4
CA06-31.1	341.432	88.3712	4.1685	2.61551	0.0901625	0.876965	4.16926	2.61557	0.090009	0.895018	2.97666	2.76447	0.239851	2.61557	0.94614	1383.08	34.9105	1424.89	17.0946	3.03898	1424.89	17.0946	338.611	0.0623179	13.5404	0.564485	0.0735852	5.92674	141.287	11197.8
CA06-61.1	724.881	53.4885	4.1049	2.93279	0.087767	0.64937	4.10451	2.93281	0.0878498	0.655512	2.95108	3.00517	0.243635	2.93281	0.97592	1407.55	39.8388	1378.37	12.6004	-2.19641	1378.37	12.6004	2130.09	0.0280469	0.996622	1.86599	0.0238811	26.9273	852.153	13900.8
CA06-6.1	609.356	202.115	4.02505	2.27923	0.0885187	0.645019	4.02466	2.27925	0.0886019	0.651154	3.0354	2.37044	0.248468	2.27925	0.961531	1433.27	31.5469	1394.73	12.4884	-2.86559	1394.73	12.4884	2403.85	0.0263643	8.3657	2.95791	0.0875461	38.3995	763.579	12718.6
CA06-82.1	584.41	95.7352	3.79772	2.72986	0.105117	0.461688	3.79855	2.72989	0.104932	0.473689	3.80884	2.77068	0.263258	2.72989	0.985277	1487.86	39.2624	1712.33	8.71247	13.4718	1712.33	8.71247	987.95	0.0406563	6.55874	1.70875	0.10614	17.2218	402.014	13152
CA06-38.1	169.749	37.7977	3.53394	2.35198	0.10941	0.984272	3.53583	2.35229	0.108953	1.03257	4.24861	2.56894	0.282819	2.35229	0.915665	1587.66	36.2489	1781.18	18.8293	11.1335	1781.18	18.8293	168.987	0.0273433	2.03682	0.470684	0.241149	3.70709	79.5797	10157
CA06-80.1	151.118	32.1403	3.3333	2.49887	0.112253	0.902169	3.3352	2.49919	0.111764	0.958045	4.62041	2.67653	0.299832	2.49919	0.933743	1675.14	40.7648	1827.5	17.3713	8.52012	1827.5	17.3713	1269.25	0.0415656	6.60133	1.52014	0.479033	20.5481	439.849	9173.69
CA06-28.1	77.3778	46.3035	3.36706	1.68311	0.0983929	1.63923	3.36261	1.68569	0.0995435	1.81236	4.08166	2.47511	0.297388	1.68569	0.681055	1684.88	27.7642	1614.76	33.7525	-4.47351	1614.76	33.7525	796.217	2.56296	17.8224	2.39278	0.389582	20.5359	262.158	9539.26
CA06-43.1	102.595	58.9365	3.29026	1.53248	0.104796	2.74249	3.29026	1.53248	0.104796	2.74249	4.39152	3.14161	0.303927	1.53248	0.487799	1710.84	26.1365	1709.93	50.4574	-0.0546772	1709.93	50.4574	677.918	0.0334841	23.0341	5.84059	1.70658	34.0971	166.968	8656.43
CA06-17.1	250.788	23.976	3.27653	2.38362	0.106634	0.788584	3.2776	2.38373	0.106352	0.812951	4.47393	2.51854	0.305101	2.38373	0.946472	1714.29	39.8564	1737	14.9062	1.34053	1737	14.9062	948.611	0.011901	0.602671	1.1514	0.039187	16.1016	343.384	12404.3
CA06-3.1	161.437	31.7403	1.9585	1.39053	0.22104	2.0724	1.95906	1.39067	0.2208	2.07667	15.54	2.49931	0.510449	1.39067	0.556424	2525.27	40.6981	2985.83	33.4224	13.3533	2985.83	33.4224	436.038	0.0269123	3.7384	0.614818	0.100883	7.69344	150.885	13785.6

## Sheet: CA08
			Total				204Pb-corrected									207Pb-corrected		204Pb-corrected			Preferred Age
Spot Name	U (ppm)	Th (ppm)	238U/206Pb	% err	207Pb/206Pb	% err	238U/206Pb*	% err	207Pb*/206Pb*	% err	207Pb*/235U	% err	206Pb*/238U	% err	err corr	206Pb/238U Age (Ma)	± 1s	206Pb/207Pb Age (Ma)	± 1s	% discordant	Age (Ma)	± 1s	Y (ppm)	La (ppm)	Ce (ppm)	Sm (ppm)	Eu (ppm)	Gd (ppm)	Yb (ppm)	Hf (ppm)
CA08-34.1	2094.78	1060.65	356.045	2.05239	0.0451586	4.30767	354.189	2.08524	0.0492859	7.07953	0.0191862	7.38025	0.00282335	2.08524	0.282543	18.1089	0.37396	160.437	165.602	88.7963	18.1089	0.37396	4490.54	0.796319	44.6262	7.79603	0.30989	104.951	1224.69	12342
CA08-17.1	857.267	181.324	76.4324	2.91029	0.0564816	3.05997	76.6782	2.91916	0.0539593	4.61758	0.0970278	5.46292	0.0130415	2.91916	0.534358	82.8717	2.40825	368.371	104.039	77.8235	82.8717	2.40825	1326.48	0.703795	46.4676	4.84646	1.97444	28.602	485.462	12042.3
CA08-24.1	72.3978	24.6249	74.8877	1.7333	0.0468915	10.9937	77.5297	3.03863	0.0188685	112.39	0.033556	112.431	0.0128983	3.03863	0.0270266	85.6028	1.57728				85.6028	1.57728	147.194	0.0129044	8.83238	0.334232	0.233771	2.89407	63.2359	13207
CA08-28.1	233.544	55.3525	72.7228	2.59112	0.0458023	5.78233	72.7228	2.59112	0.0458023	5.78233	0.0868395	6.33634	0.0137508	2.59112	0.40893	88.2596	2.29511	-13.8339	139.747	741.459	88.2596	2.29511	960.779	0.01755	10.8982	2.09029	0.571804	19.7186	362.03	9574.06
CA08-32.1	1254.66	502.071	68.4566	1.99808	0.0495606	2.55825	68.4566	1.99808	0.0495606	2.55825	0.0998211	3.24607	0.0146078	1.99808	0.615539	93.2925	1.86095	173.423	59.6988	46.4278	93.2925	1.86095	1673.09	0.29567	46.1474	3.35454	1.57064	31.6979	645.052	11844.7
CA08-42.1	353.779	121.346	68.1736	1.23424	0.0488674	4.56347	69.4761	1.46016	0.0337186	19.8743	0.0669169	19.9279	0.0143934	1.46016	0.0732724	93.7595	1.1811	-814.818	565.683	112.122	93.7595	1.1811	363.818	0.0252048	14.6001	0.561896	0.300014	6.76675	161.584	12392.4
CA08-13.1	229.445	65.7117	64.728	1.3134	0.0469632	5.58434	64.728	1.3134	0.0469632	5.58434	0.100038	5.73671	0.0154493	1.3134	0.228947	98.9607	1.33322	46.3155	133.433	-114.258	98.9607	1.33322	616.128	0.0120738	8.40037	1.67705	0.805593	16.3008	234.319	9681.85
CA08-49.1	234.955	99.4746	64.0989	1.30592	0.0500358	5.60937	63.8019	1.3857	0.0537062	8.5638	0.116063	8.67518	0.0156735	1.3857	0.159732	99.5428	1.33999	357.766	193.313	72.5351	99.5428	1.33999	945.166	0.0205523	14.6656	2.69191	0.529118	24.6739	292.938	8996.57
CA08-36.1	62.1675	24.647	63.7267	4.44026	0.0543569	10.228	63.7267	4.44026	0.0543569	10.228	0.117607	11.1503	0.015692	4.44026	0.39822	99.5778	4.45386	384.89	229.778	74.4947	99.5778	4.45386	227.283	0.011277	3.73562	0.691041	0.311856	6.55656	68.1733	7831.31
CA08-25.1	265.342	81.8406	63.6739	1.27663	0.0493022	5.13863	63.6739	1.27663	0.0493022	5.13863	0.10676	5.29484	0.015705	1.27663	0.241108	100.296	1.31303	161.211	120.184	37.9817	100.296	1.31303	623.155	0.025452	9.69971	1.53182	0.210299	15.1801	211.455	10747
CA08-12.1	106.782	43.5307	63.3681	1.52652	0.0531768	7.39717	63.3681	1.52652	0.0531768	7.39717	0.115705	7.55304	0.0157808	1.52652	0.202107	100.288	1.60211	335.36	167.642	70.4477	100.288	1.60211	568.697	0.0208932	5.19989	2.34394	1.08951	19.0811	196.801	8027.77
CA08-8.1	336.46	78.3544	63.0297	1.24116	0.0508462	4.18999	63.3732	1.29961	0.0465333	8.03847	0.101242	8.14285	0.0157795	1.29961	0.159602	101.12	1.2775	24.2997	192.872	-317.824	101.12	1.2775	1078.46	0.0225601	10.7867	1.67827	0.195278	20.1456	406.827	11556.6
CA08-1.1	219.87	94.4846	62.4653	1.31628	0.0427754	5.90405	62.4653	1.31628	0.0427754	5.90405	0.0944183	6.049	0.0160089	1.31628	0.217602	103.063	1.38765	-181.757	147.401	157.583	103.063	1.38765	1056.71	0.0109255	4.16899	4.01903	0.492886	33.2279	277.427	9928.09
CA08-6.1	137.954	89.5974	59.0859	2.38131	0.0510174	6.44683	59.4713	2.46907	0.0458529	13.4412	0.106307	13.6661	0.0168148	2.46907	0.180671	107.808	2.59147	-11.1617	324.68	1071.98	107.808	2.59147	953.355	0.0249375	18.9036	3.47044	0.97048	28.245	317.488	11334.8
CA08-31.1	108.934	45.5819	58.0088	5.82405	0.0461018	16.0097	58.5074	5.88713	0.0392544	25.8696	0.092508	26.531	0.0170919	5.88713	0.221896	110.476	6.47782	-400.921	674.839	128.345	110.476	6.47782	321.807	0.00801845	11.6235	0.482548	0.232544	5.96875	150.451	11224.9
CA08-26.1	164.694	34.2673	57.1345	3.37749	0.0540122	5.85412	57.7847	3.47207	0.0450342	15.9298	0.107456	16.3038	0.0173056	3.47207	0.212961	111.05	3.75532	-54.8636	388.022	304.206	111.05	3.75532	359.199	0.0120292	15.4836	0.45408	0.438097	5.23505	178.332	10847
CA08-14.1	118.862	28.6538	56.118	2.54593	0.0484475	7.15368	56.118	2.54593	0.0484475	7.15368	0.119034	7.59321	0.0178196	2.54593	0.33529	113.843	2.92327	120.151	168.587	5.28119	113.843	2.92327	217.978	0.00928524	9.00971	0.34963	0.170306	3.35029	120.895	12695.1
CA08-30.1	93.5247	51.799	54.8008	1.59032	0.040262	9.02261	54.2663	1.86563	0.0480942	17.7783	0.122198	17.8759	0.0184276	1.86563	0.104366	117.756	1.93513	102.877	420.321	-14.5515	117.756	1.93513	1030.21	0.0288	14.2329	3.80501	1.26341	30.9409	326.711	9492.89
CA08-35.1	215.228	48.1258	53.3271	1.31878	0.0495834	5.08131	53.1206	1.37444	0.0526567	7.51813	0.136676	7.64273	0.0188251	1.37444	0.179836	119.594	1.61219	313.042	171.062	62.1675	119.594	1.61219	1112.08	0.0114016	1.98371	1.70026	0.159178	19.4871	408.995	8631.2
CA08-7.1	104.932	34.181	51.7255	1.53676	0.0585587	6.84794	51.7255	1.53676	0.0585587	6.84794	0.156095	7.01826	0.0193328	1.53676	0.218966	121.889	1.96149	549.777	149.524	78.2842	121.889	1.96149	428.726	0.00496277	9.19223	0.786069	0.53842	7.94716	184.868	10246.6
CA08-4.1	199.562	82.5411	50.8365	1.33624	0.0498737	5.08999	51.0361	1.39273	0.0467564	8.6321	0.126318	8.74373	0.019594	1.39273	0.159283	125.369	1.71139	35.7628	206.667	-252.212	125.369	1.71139	1078.54	0.00837468	5.4901	3.27511	0.467498	31.0313	313.901	9418.78
CA08-21.1	47.8321	21.6427	50.8994	1.97327	0.046209	11.3708	47.6816	3.72872	0.0966338	24.9882	0.279434	25.2649	0.0209724	3.72872	0.147585	125.79	2.59987	1559.31	468.749	92.3361	125.79	2.59987	486.175	0.010708	10.9832	1.1462	0.429361	12.6782	171.017	10342.2
CA08-39.1	102.423	42.3872	49.7034	1.56423	0.0510989	7.18028	50.1108	1.76601	0.0445999	16.8721	0.122717	16.9643	0.0199558	1.76601	0.104102	128.012	2.07442	-78.5206	412.85	264.834	128.012	2.07442	500.768	0.0186982	10.7319	0.725375	0.254095	9.31139	212.769	11682.1
CA08-10.1	150.264	100.842	46.5574	2.98963	0.0465023	5.79497	46.7818	3.02823	0.0426555	11.0644	0.125719	11.4713	0.0213758	3.02823	0.263983	137.388	4.10432	-188.765	276.615	174.073	137.388	4.10432	837.625	0.00922924	25.3514	2.35077	0.947087	22.0247	288.846	9791.51
CA08-43.1	197.899	52.3001	43.9689	4.43076	0.0492884	4.91194	44.1278	4.44548	0.0464124	8.12933	0.145018	9.26544	0.0226615	4.44548	0.479792	144.912	6.38801	18.0508	195.283	-708.166	144.912	6.38801	680.864	0.00555442	2.66485	1.01478	0.0662173	12.205	237.45	11744.5
CA08-27.1	141.87	72.8336	44.1203	5.44719	0.0439484	6.19357	44.7981	5.51896	0.03164	24.4248	0.0973818	25.0406	0.0223224	5.51896	0.220401	145.38	7.87539	-999.614	724.029	115.54	145.38	7.87539	1043.05	0.0211513	14.6259	4.24563	0.952886	32.0465	314.748	10487.3
CA08-18.1	119.049	87.0009	40.9049	1.49297	0.0537485	5.78386	40.9049	1.49297	0.0537485	5.78386	0.181172	5.97344	0.0244469	1.49297	0.249934	154.815	2.37097	359.544	130.519	57.3791	154.815	2.37097	625.001	0.0255492	29.1788	0.84025	0.125745	10.271	246.349	11333.5
CA08-16.1	167.698	67.5059	40.4558	1.38422	0.0493837	4.75932	40.5949	1.42626	0.0466458	7.76234	0.158432	7.89228	0.0246336	1.42626	0.180715	157.375	2.20946	30.0903	186.043	-426.51	157.375	2.20946	541.313	0.0127987	14.1028	0.939686	0.330951	9.88182	250.547	11295.9
CA08-29.1	56.1036	17.8356	39.3983	5.26419	0.0429382	9.2386	39.8488	5.387	0.0337517	29.99	0.116783	30.47	0.0250948	5.387	0.176797	162.861	8.53943	-812.031	853.091	121.203	162.861	8.53943	188.151	0.0159421	6.19216	0.29767	0.156905	3.66277	100.263	10986.2
CA08-48.1	432.247	496.436	38.3897	1.21033	0.048205	3.15617	38.2236	1.23582	0.0516574	4.83332	0.186338	4.98882	0.0261618	1.23582	0.247719	166.017	2.01692	269.275	110.84	38.6678	166.017	2.01692	3941.15	0.102634	120.681	19.4659	0.428949	155.137	972.256	8352.92
CA08-20.1	1308.27	599.36	36.6467	1.98959	0.051741	1.61978	36.6467	1.98959	0.051741	1.61978	0.194671	2.56557	0.0272876	1.98959	0.775496	173.08	3.41808	272.983	37.1209	36.9159	173.08	3.41808	492.72	1.85761	88.2815	6.13578	2.41971	16.7331	256.467	8815.41
CA08-2.1	165.254	70.0757	36.6014	1.37776	0.0510127	4.68709	36.6014	1.37776	0.0510127	4.68709	0.192168	4.88539	0.0273213	1.37776	0.282016	173.45	2.42429	240.4	108.049	28.0943	173.45	2.42429	202.678	0.146062	14.201	0.446486	0.388695	3.58286	99.2515	9284.45
CA08-19.1	305.041	134.229	36.3849	1.252	0.0474444	3.56076	36.5209	1.27959	0.0444554	6.10943	0.167836	6.24199	0.0273816	1.27959	0.204997	175.248	2.2053	-86.4706	149.723	305.503	175.248	2.2053	361.139	0.0171496	8.45382	1.04831	0.148708	9.22097	131.224	8600.35
CA08-46.1	202.965	89.6375	35.6734	1.33342	0.0495711	4.40216	36.0958	1.45896	0.0401256	13.1208	0.153273	13.2017	0.0277041	1.45896	0.110513	178.24	2.40423	-343.99	338.339	153.315	178.24	2.40423	401.983	0.0116663	16.678	0.874353	0.245146	9.1522	153.727	10755.3
CA08-5.1	368.012	234.223	35.2312	1.91347	0.0502331	3.02422	35.3313	1.924	0.0479677	4.61567	0.187193	5.00062	0.0283035	1.924	0.384751	180.309	3.43552	96.645	109.252	-87.3785	180.309	3.43552	1865.94	0.0730584	18.0504	6.42835	1.153	51.2964	557.468	10634.8
CA08-38.1	148.277	63.6855	34.962	1.41627	0.0483729	5.07318	34.705	1.50871	0.0542492	8.83075	0.215528	8.9587	0.0288143	1.50871	0.168407	182.104	2.61465	380.431	198.543	52.6005	182.104	2.61465	612.116	0.020251	13.4616	0.99367	0.351544	12.3034	228.064	11355.3
CA08-11.1	138.682	44.1355	34.6479	3.12689	0.0494946	5.25472	34.5081	3.15282	0.0527149	7.82095	0.210627	8.43253	0.0289787	3.15282	0.373887	183.484	5.71479	315.557	177.872	42.2373	183.484	5.71479	326.758	0.00784004	13.1028	0.650111	0.417776	5.83255	143.792	10035.6
CA08-15.1	360.653	150.722	33.2195	2.03477	0.0517899	3.01438	33.2675	2.03991	0.0506377	3.83726	0.209872	4.34578	0.0300593	2.03991	0.4694	190.753	3.86175	223.366	88.7323	14.7421	190.753	3.86175	735.703	0.0120614	21.2313	1.70993	0.271286	15.9628	264.426	11715.8
CA08-44.1	512.045	264.039	30.8847	1.8227	0.0498222	2.60607	30.8847	1.8227	0.0498222	2.60607	0.222424	3.18023	0.0323785	1.8227	0.573135	205.525	3.72205	185.694	60.6782	-10.7913	205.525	3.72205	834.051	0.0222469	49.4253	1.80974	1.22905	19.5455	305.35	10126.5
CA08-9.1	87.5859	10.5467	27.0295	1.62541	0.0507938	5.55376	27.1614	1.69707	0.0468892	10.3238	0.238025	10.4623	0.036817	1.69707	0.162207	234.213	3.8499	42.549	246.853	-455.959	234.213	3.8499	245.444	0.0150315	2.33674	0.281233	0.242133	3.95199	167.927	10526.7
CA08-37.1	1064.81	283.088	10.3447	2.49139	0.0605508	1.99548	10.3464	2.49144	0.060416	2.01269	0.805125	3.20284	0.0966519	2.49144	0.777885	594.309	14.4463	617.565	43.4485	3.866	594.309	14.4463	1661.79	0.0486777	14.011	1.98326	0.0437191	29.3639	481.754	15153.9
CA08-22.1	462.369	86.9534	5.61872	1.58083	0.0883558	0.847311	5.62458	1.5814	0.0874961	0.945975	2.14487	1.84274	0.177791	1.5814	0.858178	1039.14	15.8618	1370.61	18.2032	24.9538	1370.61	18.2032	1745.72	0.995267	18.7376	4.79664	1.18305	31.9067	571.482	12358.6
CA08-47.1	399.903	88.3977	5.28229	1.20601	0.103497	0.813216	5.28132	1.20615	0.103647	0.824668	2.70593	1.46112	0.189347	1.20615	0.825496	1083.48	12.6375	1689.63	15.2116	36.8133			494.227	0.0451068	11.9251	1.20971	0.201264	11.4208	218.81	12098
CA08-40.1	264.768	47.9524	4.28279	1.27552	0.0867417	0.950429	4.28101	1.27586	0.0870973	0.989174	2.80517	1.6144	0.23359	1.27586	0.7903	1352.7	16.6813	1361.81	19.0577	0.693786	1361.81	19.0577	2040.42	0.0207402	1.39109	1.91233	0.0458896	27.1458	690.168	13493.9
CA08-33.1	259.643	126.474	4.2149	2.36325	0.0882252	0.999607	4.2149	2.36325	0.0882252	0.999607	2.88607	2.56596	0.237254	2.36325	0.920999	1371.4	31.2818	1386.56	19.1929	1.13318	1386.56	19.1929	1892.91	0.0232226	6.45899	3.09741	0.0938163	37.4111	562.365	11674
CA08-3.1	217.407	125.386	4.11183	1.31814	0.0930539	1.04887	4.11292	1.31841	0.0928272	1.0797	3.1119	1.7041	0.243136	1.31841	0.773668	1396.89	17.8293	1483.54	20.4589	6.04121	1483.54	20.4589	782.397	0.0255243	26.7108	1.38323	0.148909	15.0547	267.487	11564.1
CA08-23.1	2080.01	93.6096	4.128	1.98714	0.088593	0.3486	4.128	1.98714	0.088593	0.3486	2.95911	2.01748	0.242248	1.98714	0.984959	1398.65	26.8159	1394.54	6.68593	-0.305775	1394.54	6.68593	1162.84	0.0392437	7.65154	0.559283	0.0825478	11.2232	470.941	12300.5
CA08-41.1	601.743	59.0705	4.0279	2.45104	0.088695	0.61988	4.0279	2.45104	0.088695	0.61988	3.03614	2.52821	0.248268	2.45104	0.969476	1432.01	33.8912	1396.75	11.8853	-2.61785	1396.75	11.8853	2364.92	0.00902174	1.35444	1.88358	0.0416518	29.3792	788.176	14221.1
CA08-45.1	56.0404	34.0017	1.88575	1.84219	0.173354	1.07442	1.88575	1.84219	0.173354	1.07442	12.675	2.13262	0.530292	1.84219	0.863817	2802.06	60.8081	2589.56	17.9273	-7.26595	2589.56	17.9273	1019.41	0.0337601	15.1574	7.00101	0.659195	46.4205	248	9309.27

## Sheet: CA09
			Total				204Pb-corrected									207Pb-corrected		204Pb-corrected			Preferred Age
Spot Name	U (ppm)	Th (ppm)	238U/206Pb	% err	207Pb/206Pb	% err	238U/206Pb*	% err	207Pb*/206Pb*	% err	207Pb*/235U	% err	206Pb*/238U	% err	err corr	206Pb/238U Age (Ma)	± 1s	206Pb/207Pb Age (Ma)	± 1s	% discordant	Age (Ma)	± 1s	Y (ppm)	La (ppm)	Ce (ppm)	Sm (ppm)	Eu (ppm)	Gd (ppm)	Yb (ppm)	Hf (ppm)
CA09-70.1	89.0388	50.3289	395.206	2.45889	0.0515228	39.753	374.612	5.76884	0.0924384	46.9745	0.0340229	47.3274	0.00266943	5.76884	0.121892	16.185	0.579693	1475.58	891.059	98.9622	16.185	0.579693	823.228	0.0245753	3.87936	1.65911	0.315303	17.5276	258.101	7849.25
CA09-34.1	102.368	52.5527	362.476	9.95087	0.0397109	17.4116	362.476	9.95087	0.0397109	17.4116	0.0151054	20.0545	0.0027588	9.95087	0.496191	17.9102	1.78728	-370.856	451.432	104.935	17.9102	1.78728	975.206	0.0193979	4.35832	1.86513	0.422541	20.2023	295.02	7906.53
CA09-66.1	161.821	65.7542	349.363	2.35719	0.0359878	32.0204	340.256	3.51574	0.0568637	40.8633	0.0230425	41.0142	0.00293896	3.51574	0.0857201	18.6685	0.515044	485.292	902.127	96.2411	18.6685	0.515044	1079.54	0.0173291	8.47022	1.93963	0.227152	22.5595	333.906	9239.45
CA09-18.1	278.636	129.568	345.304	2.65777	0.0435193	9.94428	345.304	2.65777	0.0435193	9.94428	0.0173773	10.2933	0.002896	2.65777	0.258203	18.7103	0.507138	-138.888	246.195	113.587	18.7103	0.507138	2094.49	0.0232375	8.21845	4.16842	0.598309	43.092	624.482	8818.96
CA09-43.1	117.98	24.2417	74.5944	2.40016	0.0494977	6.14693	74.5944	2.40016	0.0494977	6.14693	0.0914913	6.59891	0.0134058	2.40016	0.363722	85.6571	2.0728	170.458	143.522	49.9689	85.6571	2.0728	186.856	0.0187919	1.88486	1.06481	0.169227	9.07595	34.9008	10997.3
CA09-37.1	366.119	137.576	73.0825	2.61825	0.0471984	3.91371	72.8586	2.6361	0.0496308	6.13548	0.0939229	6.67781	0.0137252	2.6361	0.394755	87.6738	2.29403	176.725	143.09	50.6175	87.6738	2.29403	289.526	0.0226769	15.2201	0.634644	0.250123	5.35646	113.475	10371.6
CA09-51.1	286.548	140.223	71.2964	2.31347	0.0491291	4.17052	71.8117	2.36928	0.0434017	10.5346	0.0833321	10.7978	0.0139253	2.36928	0.219422	89.6425	2.07702	-145.596	261.153	162.355	89.6425	2.07702	652.288	0.0149458	24.5273	1.38664	0.482637	12.7423	246.873	10064.4
CA09-12.1	868.871	302.884	71.2419	3.57535	0.0484867	4.89587	71.2419	3.57535	0.0484867	4.89587	0.0938401	6.0624	0.0140367	3.57535	0.589758	89.7832	3.20623	122.059	115.338	26.5663	89.7832	3.20623	1884.99	0.436289	40.8526	3.98565	1.05765	43.6955	474.247	11897.6
CA09-49.1	96.1709	56.1403	69.5596	4.09528	0.0428492	7.28563	69.5596	4.09528	0.0428492	7.28563	0.0849351	8.35773	0.0143762	4.09528	0.489999	92.5945	3.79088	-177.451	181.74	152.948	92.5945	3.79088	588.004	0.0259153	20.1176	1.90904	1.11877	14.2942	183.885	8109.37
CA09-10.1	365.536	384.897	68.6761	3.01192	0.046884	3.36217	68.6761	3.01192	0.046884	3.36217	0.0941282	4.51397	0.0145611	3.01192	0.667246	93.3085	2.8028	42.2797	80.3973	-121.287	93.3085	2.8028	1665.53	0.0638574	47.194	8.75917	2.14361	59.0047	433.355	9522.66
CA09-44.1	62.7884	17.6251	68.3032	2.53919	0.0489736	8.55756	68.3032	2.53919	0.0489736	8.55756	0.0988603	8.92633	0.0146406	2.53919	0.284461	93.57	2.41506	145.545	200.726	35.8838	93.57	2.41506	416.625	0.0220486	4.16123	0.751401	0.145529	7.5842	133.193	10392.2
CA09-46.1	247.742	131.321	66.6224	2.74307	0.0464421	4.40525	66.6224	2.74307	0.0464421	4.40525	0.0961153	5.18948	0.01501	2.74307	0.528583	96.2236	2.6378	19.5866	105.792	-393.263	96.2236	2.6378	454.535	0.0137489	16.6909	1.34119	0.619971	10.0858	156.227	10007.7
CA09-58.1	275.682	105.344	66.2421	2.31377	0.0494497	4.03755	66.4714	2.33953	0.0467066	7.28971	0.0968822	7.65593	0.0150441	2.33953	0.305584	96.4092	2.23263	33.2065	174.612	-191.3	96.4092	2.23263	336.794	0.0144162	13.9049	0.745018	0.206397	7.02785	114.539	10112
CA09-27.1	220.141	73.2783	66.1591	2.32446	0.0500729	4.16855	66.1591	2.32446	0.0500729	4.16855	0.104355	4.77283	0.0151151	2.32446	0.487019	96.454	2.24509	197.365	96.8509	51.3825	96.454	2.24509	924.925	0.0199251	14.7732	1.78495	1.12532	16.9685	361.642	9131.13
CA09-3.1	545.528	187.869	65.8823	2.89025	0.0456123	6.35162	66.0013	2.89589	0.0441735	7.33608	0.0922806	7.88697	0.0151512	2.89589	0.367174	97.4001	2.82296	-102.084	180.329	196.436	97.4001	2.82296	993.353	0.0166799	9.20254	1.79446	0.256551	17.5212	358.578	10525.3
CA09-7.1	270.189	146.051	64.1531	4.04492	0.065897	3.51358	65.6752	4.14325	0.0474842	15.8213	0.0996895	16.3548	0.0152265	4.14325	0.253335	97.4772	3.93356	72.6147	376.174	-34.4139	97.4772	3.93356	482.564	0.473695	22.8319	1.46847	0.345666	11.8774	148.05	9934.65
CA09-52.1	303.846	133.297	65.5405	2.30369	0.0449139	3.78722	65.7208	2.32006	0.0427211	6.51424	0.0896274	6.91506	0.0152159	2.32006	0.335509	97.9907	2.25553	-184.927	162.736	153.806	97.9907	2.25553	955.636	0.0359541	14.994	2.10459	0.9308	18.1876	323.949	8287.27
CA09-53.1	1125.74	1232.7	64.693	3.24059	0.0472779	2.01232	64.6403	3.24161	0.0479254	2.39937	0.102227	4.033	0.0154702	3.24161	0.803774	98.975	3.19306	94.5598	56.8148	-4.69335	98.975	3.19306	1747.93	0.288044	48.7173	7.0622	1.405	53.815	496.307	8047.73
CA09-72.1	718.472	305.809	64.5997	2.27062	0.0477953	2.50785	64.5997	2.27062	0.0477953	2.50785	0.102013	3.38305	0.0154799	2.27062	0.671175	99.053	2.24249	88.1162	59.455	-12.4762	99.053	2.24249	609.986	0.329665	17.5516	1.30274	0.52655	12.7002	246.642	11057.7
CA09-36.1	869.646	393.748	64.3641	2.97222	0.0471093	2.21291	64.3008	2.97384	0.0478915	2.71866	0.102694	4.02925	0.0155519	2.97384	0.738063	99.4992	2.94491	92.8805	64.3955	-7.16307	99.4992	2.94491	478.542	0.0177332	19.7692	1.0199	0.250668	8.16292	204.08	11183.7
CA09-69.1	389.048	252.106	63.3238	2.29278	0.0531333	6.09321	63.8557	2.33094	0.0465063	10.0461	0.100418	10.3129	0.0156603	2.33094	0.226021	100.363	2.32548	22.9029	241.105	-340.005	100.363	2.32548	1000.97	0.248099	20.0608	4.14864	1.18253	29.6587	314.278	9576.34
CA09-21.1	1782.01	1851.05	63.0647	2.71967	0.0484458	1.51459	63.1537	2.72089	0.0473254	2.06988	0.103323	3.41872	0.0158344	2.72089	0.795879	101.369	2.74397	64.6427	49.2879	-57.1161	101.369	2.74397	5305.45	0.0590091	56.7648	12.8925	2.01139	137.962	1329.73	10334.5
CA09-2.1	49.1692	13.1082	61.2186	3.93704	0.0629785	8.05044	61.2186	3.93704	0.0629785	8.05044	0.141844	8.96157	0.0163349	3.93704	0.439325	102.508	4.06875	706.58	171.249	85.8988	102.508	4.06875	335.375	0.0312445	16.7697	1.08423	0.794526	9.09301	102.889	8999.65
CA09-65.1	959.739	468.144	62.307	2.26436	0.048309	2.25118	62.2434	2.26666	0.0491196	2.7586	0.108809	3.57038	0.016066	2.26666	0.63485	102.612	2.31536	152.525	64.6224	32.898	102.612	2.31536	1280.75	0.0247603	20.6385	2.68514	0.472197	24.4549	432.862	11602.6
CA09-60.1	517.917	145.492	61.6486	3.45321	0.0489694	8.20712	61.747	3.4569	0.0477021	8.84824	0.106518	9.49956	0.0161951	3.4569	0.363901	103.617	3.59696	83.4869	209.951	-24.2421	103.617	3.59696	980.969	0.0313373	17.8724	1.35408	0.525294	18.0887	286.925	10253.2
CA09-35.1	415.089	238.152	59.8883	2.28642	0.0477764	2.92456	59.9918	2.29296	0.0464019	4.23145	0.106646	4.81278	0.0166689	2.29296	0.476431	106.805	2.43566	17.506	101.658	-512.986	106.805	2.43566	902.947	0.0301128	18.1523	1.81907	0.678315	15.3407	384.047	8928.42
CA09-30.1	113.801	41.5948	59.8855	2.41476	0.0468775	5.96802	59.8855	2.41476	0.0468775	5.96802	0.10793	6.43804	0.0166985	2.41476	0.375077	106.93	2.59487	41.9495	142.718	-155.774	106.93	2.59487	414.782	0.0150999	4.11085	1.24155	0.479772	10.299	140.09	7348.82
CA09-68.1	253.23	84.5888	59.5952	3.86251	0.0451402	8.30062	59.5952	3.86251	0.0451402	8.30062	0.104437	9.15528	0.0167799	3.86251	0.421888	107.681	4.16648	-49.1435	201.967	320.951	107.681	4.16648	792.294	0.0242114	6.96088	2.3883	0.582096	21.6258	225.988	10090.1
CA09-11.1	688.717	429.933	58.6805	2.2704	0.0474429	2.50299	58.8288	2.27743	0.0454328	4.08705	0.106483	4.67874	0.0169985	2.27743	0.486761	109.036	2.4669	-33.4421	99.1456	428.519	109.036	2.4669	1604.72	0.370556	22.4452	3.81284	0.895116	30.3686	515.475	10326.6
CA09-47.1	206.967	216.117	58.0672	3.02408	0.048212	4.32957	57.848	3.04755	0.0512115	7.10923	0.122062	7.7349	0.0172867	3.04755	0.394	110.075	3.32226	249.359	163.62	56.1692	110.075	3.32226	1496.28	0.0549893	22.2301	6.07237	1.53894	47.8716	392.963	9074.39
CA09-15.1	1262.19	556.768	57.904	2.8298	0.049579	1.73911	57.904	2.8298	0.049579	1.73911	0.118057	3.32148	0.01727	2.8298	0.851968	110.195	3.10279	174.288	40.5771	36.983	110.195	3.10279	896.222	0.100627	59.7049	1.66376	0.667066	15.5812	356.819	11356.4
CA09-73.1	2231.8	1156.34	57.8253	2.29697	0.0482257	1.27496	57.8444	2.29721	0.0479632	1.39432	0.114327	2.68725	0.0172878	2.29721	0.854857	110.531	2.52578	96.4252	33.0045	-14.7135	110.531	2.52578	2115.88	0.0383514	41.135	4.69634	1.12019	39.1767	773.3	11076.8
CA09-56.1	153.888	66.5274	57.2955	2.37048	0.0520898	4.79495	58.1802	2.53268	0.0398804	19.049	0.0945117	19.2166	0.017188	2.53268	0.131797	111.008	2.63943	-359.826	492.78	131.66	111.008	2.63943	848.073	0.0291357	9.70324	1.44256	0.543643	15.6865	277.638	8388.3
CA09-39.1	617.83	501.437	57.0126	2.66422	0.0468845	2.70567	57.0126	2.66422	0.0468845	2.70567	0.113386	3.7972	0.01754	2.66422	0.701628	112.286	2.97948	42.3062	64.6984	-166.39	112.286	2.97948	1954.67	0.107006	69.124	10.4019	4.484	65.9311	603.426	10516.9
CA09-24.1	556.731	353.329	55.5066	3.10492	0.0483962	2.44313	55.5066	3.10492	0.0483962	2.44313	0.120218	3.95088	0.0180159	3.10492	0.785881	115.097	3.55647	117.656	57.6029	2.18873	115.097	3.55647	1782.55	0.0220437	13.4261	3.01276	0.564963	34.2665	569.168	8801.86
CA09-63.1	121.122	43.6519	54.9918	4.68822	0.0495721	5.49289	54.9918	4.68822	0.0495721	5.49289	0.124291	7.22159	0.0181845	4.68822	0.649196	115.997	5.42004	173.963	128.169	33.5202	115.997	5.42004	920.235	0.106707	7.90496	1.23224	0.364153	13.1382	358.817	10510.4
CA09-14.1	643.353	267.79	54.7098	2.50143	0.0486493	2.3752	54.7738	2.50416	0.0477205	3.11033	0.120125	3.99311	0.0182569	2.50416	0.627119	116.726	2.9071	84.4019	73.7893	-38.531	116.726	2.9071	385.125	0.0150676	24.6746	0.7128	0.361836	6.51154	179.466	10878.2
CA09-6.1	248.474	108.473	54.4497	3.21306	0.0478532	4.02169	54.2711	3.22977	0.0504626	6.40452	0.128204	7.17282	0.018426	3.22977	0.450279	117.397	3.75977	215.349	148.313	45.7584	117.397	3.75977	704.064	0.0939677	12.8274	1.28728	0.246626	13.3593	250.919	9982.6
CA09-8.1	661.7	426.308	53.1027	3.06375	0.0489169	2.40525	53.1657	3.06605	0.0479736	3.14731	0.124415	4.39389	0.0188091	3.06605	0.6978	120.196	3.66394	96.9358	74.4923	-24.1461	120.196	3.66394	2393.32	0.0592265	21.8558	6.94769	0.704208	58.0353	650.338	11275.4
CA09-5.1	109.214	43.3854	52.8813	7.35814	0.0445966	15.1943	52.8813	7.35814	0.0445966	15.1943	0.116279	16.8822	0.0189103	7.35814	0.435851	121.348	8.93181	-78.7032	371.808	255.838	121.348	8.93181	328.767	0.0138807	10.4524	0.765911	0.278951	6.7422	135.744	9738.2
CA09-20.1	653.511	231.909	52.0552	2.271	0.0474146	2.30361	52.1115	2.27357	0.0465536	2.99086	0.123174	3.75691	0.0191896	2.27357	0.605171	122.83	2.77684	25.3423	71.7473	-387.174	122.83	2.77684	1343.79	0.019085	41.8396	2.17139	1.57387	25.6178	528.963	11077
CA09-67.1	44.6787	15.5544	46.1552	2.66479	0.0506981	8.35442	46.1552	2.66479	0.0506981	8.35442	0.151451	8.76911	0.021666	2.66479	0.303884	137.853	3.71985	226.123	193.089	39.3105	137.853	3.71985	427.89	0.0239909	6.81514	0.761543	0.331687	8.32699	161.293	9522.83
CA09-55.1	173.162	77.7506	46.0856	2.77598	0.0474967	4.24905	45.9235	2.79819	0.0503008	6.84464	0.151022	7.39452	0.0217753	2.79819	0.378413	138.612	3.83632	207.909	158.72	33.5663	138.612	3.83632	639.741	0.0425055	16.859	1.29695	0.57563	12.0861	244.077	9555.78
CA09-41.1	154.348	55.4286	43.6729	2.37095	0.0484087	4.27965	44.0069	2.43185	0.0423158	11.3856	0.132582	11.6424	0.0227237	2.43185	0.208879	146.046	3.45738	-208.796	285.77	171.3	146.046	3.45738	475.219	0.037932	6.19682	0.887601	0.324649	9.62119	170.982	10589.9
CA09-50.1	26.7439	29.4818	42.1204	4.32261	0.0424287	10.1737	42.9346	4.73552	0.0269035	61.0831	0.0863977	61.2664	0.0232912	4.73552	0.077294	152.514	6.59155				152.514	6.59155	819.291	0.0485188	11.8451	4.99754	1.97904	32.0651	214.462	6906.28
CA09-57.1	391.21	230.535	40.1061	4.02262	0.0498726	2.59998	40.1061	4.02262	0.0498726	2.59998	0.171456	4.78972	0.0249339	4.02262	0.839846	158.64	6.33499	188.045	60.5103	15.7645	158.64	6.33499	1136.94	0.0364679	31.6584	3.27282	0.325382	28.2494	355.741	8026.77
CA09-48.1	390.292	204.557	39.6908	2.28919	0.0500837	2.44979	39.6412	2.29261	0.0510793	3.08963	0.177664	3.84732	0.0252263	2.29261	0.595897	160.244	3.64654	243.409	71.1848	34.4444	160.244	3.64654	743.719	0.0278771	17.7107	1.73818	0.62984	14.367	304.705	8793.67
CA09-64.1	103.818	48.8178	38.947	2.44273	0.049867	5.0308	39.3636	2.5572	0.0413479	15.9545	0.144831	16.1581	0.0254042	2.5572	0.158261	163.323	3.98908	-267.21	405.115	162.566	163.323	3.98908	592.265	0.0240512	10.0421	1.03562	0.697501	8.69669	269.696	7479.42
CA09-23.1	315.625	185.136	38.0632	2.29935	0.0548665	2.46258	38.4897	2.33324	0.0459978	7.50774	0.164776	7.86194	0.025981	2.33324	0.296777	166.043	3.79604	-3.54641	181.091	4823.94	166.043	3.79604	1382.03	1.50986	126.087	2.55723	1.83367	20.4858	486.785	7127.49
CA09-40.1	58.1921	32.3781	36.9052	2.56952	0.0539883	6.18431	37.2154	2.70358	0.0473234	15.8874	0.175329	16.1158	0.0268706	2.70358	0.16776	171.397	4.42392	64.5407	378.317	-167.046	171.397	4.42392	384.832	0.0145265	14.1888	0.912376	0.337824	7.89442	152.533	9841
CA09-42.1	828.091	178.454	37.0773	2.51827	0.0493915	1.67384	37.0988	2.51894	0.0489285	1.93771	0.181846	3.17802	0.0269551	2.51894	0.792615	171.589	4.287	143.384	45.469	-19.8445	171.589	4.287	1171.41	0.017348	23.822	1.30805	0.986604	15.0758	562.278	11036.4
CA09-71.1	231.393	91.9947	36.1053	3.24876	0.0511165	3.17842	36.0266	3.25607	0.0528524	4.48899	0.202276	5.54554	0.0277573	3.25607	0.587151	175.789	5.67113	321.478	101.986	45.7162	175.789	5.67113	258.453	0.0216176	11.6669	0.404972	0.293351	4.21855	122.306	11025
CA09-25.1	499.467	238.751	35.5014	3.81692	0.0502541	2.18165	35.5014	3.81692	0.0502541	2.18165	0.195176	4.39642	0.0281679	3.81692	0.86819	178.944	6.77253	205.755	50.6101	13.1493	178.944	6.77253	835.059	0.0416612	25.7458	1.52953	0.854159	14.278	389.215	9334.52
CA09-74.1	299.48	92.5411	33.025	2.91442	0.0497602	2.40093	32.9855	2.91687	0.0507141	3.01108	0.211986	4.19222	0.0303164	2.91687	0.695781	192.35	5.5587	226.853	69.5836	15.3578	192.35	5.5587	775.274	0.018914	11.3752	1.1389	0.348147	12.9981	294.913	11594.4
CA09-17.1	294.586	170.127	32.7695	2.31714	0.0503477	2.75778	32.8207	2.32241	0.0491008	3.80671	0.206273	4.45921	0.0304686	2.32241	0.520811	193.694	4.45676	151.627	89.1898	-28.0201	193.694	4.45676	1859.36	0.0164639	28.0399	3.37527	1.10322	32.5999	612.511	9656.22
CA09-61.1	241.223	81.6941	32.0454	2.32041	0.0456692	2.99915	32.1004	2.32674	0.0442917	4.39361	0.190245	4.97168	0.0311523	2.32674	0.468	199.175	4.5876	-95.5211	107.863	311.798	199.175	4.5876	349.513	0.0156413	13.6316	0.621856	0.355309	5.16948	164.248	11078.6
CA09-62.1	607.625	313.233	27.4327	2.39186	0.0521659	1.64083	27.4327	2.39186	0.0521659	1.64083	0.262192	2.90057	0.0364528	2.39186	0.824617	230.419	5.45334	291.695	37.4771	21.2488	230.419	5.45334	532.748	0.013995	27.1932	0.995781	0.743259	10.3311	226.69	10831.3
CA09-19.1	155.743	38.0526	10.8084	6.56011	0.0872883	1.78044	10.8305	6.5617	0.0856819	2.25126	1.09079	6.93715	0.0923317	6.5617	0.945878	551.177	35.2849	1330.17	43.5652	59.7113			651.211	0.0271903	8.68422	0.713933	0.234967	9.03692	241.9	11867.4
CA09-9.1	1266.92	56.9816	9.75853	2.6011	0.0812721	1.65155	9.76065	2.60114	0.0810992	1.66229	1.14562	3.08693	0.102452	2.60114	0.842631	613.514	15.565	1222.99	32.661	50.9581			1212.83	0.088714	2.34861	1.0162	0.0535633	11.342	560.316	13384.6
CA09-32.1	521.935	154.427	5.73232	3.13939	0.0958405	0.584751	5.73363	3.13943	0.0956538	0.602072	2.30024	3.19664	0.17441	3.13943	0.982103	1010.27	30.5923	1540.16	11.3227	35.3737			1294.35	0.148993	10.1953	2.58277	0.430762	24.9977	511.653	11032.6
CA09-26.1	976.674	677.145	5.21242	2.4305	0.100322	0.433115	5.22524	2.43093	0.0983126	0.585058	2.59421	2.50035	0.191379	2.43093	0.972239	1101.66	25.8038	1591.55	10.9288	31.6596			1135.45	3.75854	69.4014	13.1825	7.71245	51.1661	352.276	8769.64
CA09-33.1	2019.81	267.198	4.3407	2.74445	0.0886887	0.290199	4.3407	2.74445	0.0886887	0.290199	2.81715	2.75975	0.230378	2.74445	0.994456	1332.35	35.2449	1396.61	5.56425	4.76653	1396.61	5.56425	1617.71	0.188787	9.88866	2.23586	0.137534	26.8201	557.974	12716.9
CA09-45.1	2337.47	846.909	4.25711	2.5438	0.0891535	0.275705	4.25701	2.5438	0.0891731	0.276512	2.88822	2.55878	0.234907	2.5438	0.994144	1356.86	33.2785	1407.05	5.29421	3.69546	1407.05	5.29421	3187.51	0.0617675	39.6164	6.04173	0.106873	68.3624	916.518	14522.4
CA09-13.1	175.469	44.4013	4.12709	2.34853	0.104707	0.858552	4.12919	2.34881	0.104281	0.909488	3.48211	2.51874	0.242178	2.34881	0.932532	1373.44	31.1371	1700.87	16.7523	19.7899	1700.87	16.7523	777.979	0.137958	17.2408	1.84588	0.480468	16.9859	256.627	9839.89
CA09-22.1	474.184	130.014	4.02544	2.73651	0.100701	2.32821	4.02544	2.73651	0.100701	2.32821	3.44924	3.59292	0.24842	2.73651	0.761641	1413.46	37.5145	1636.27	43.2392	14.0259	1636.27	43.2392	1119.02	0.0777126	8.7153	1.77243	0.0813676	18.5697	369.029	11082.2
CA09-38.1	1292.29	144.934	4.09588	2.25422	0.0866525	0.775276	4.09588	2.25422	0.0866525	0.775276	2.91699	2.38381	0.244148	2.25422	0.945636	1412.31	30.7378	1351.94	14.9572	-4.63529	1351.94	14.9572	1721.99	0.0309348	4.89759	1.68416	0.031709	19.0485	843.621	12612.8
CA09-31.1	479.553	158.523	3.99943	3.26442	0.0929746	2.60276	3.99983	3.26443	0.0928891	2.60705	3.20202	4.1777	0.250011	3.26443	0.781394	1434.91	45.3865	1484.8	49.3918	3.47648	1484.8	49.3918	2077.47	0.0437566	6.39498	2.59609	0.0569127	32.4148	673.689	12572.9
CA09-1.1	211.778	158.018	3.97463	2.3453	0.0944919	0.896424	3.97563	2.34544	0.0942772	0.927112	3.26966	2.52202	0.251532	2.34544	0.929981	1441.08	32.6585	1512.85	17.4988	4.90471	1512.85	17.4988	1062.18	0.0207934	67.0937	2.73411	0.848573	24.334	349.387	10643
CA09-59.1	407.515	72.8111	3.91083	3.33296	0.0879811	0.645988	3.91083	3.33296	0.0879811	0.645988	3.10186	3.39499	0.2557	3.33296	0.98173	1474.54	47.4911	1381.23	12.4124	-7.0101	1381.23	12.4124	3174.89	0.0266612	1.86789	2.62003	0.0697742	38.6271	1000.27	12444.7
CA09-54.1	378.313	146.518	3.73956	4.69887	0.0934747	1.3178	3.73994	4.69888	0.0933879	1.32243	3.44292	4.88142	0.267384	4.69888	0.962604	1530.3	69.6058	1494.94	25.0201	-2.44701	1494.94	25.0201	1164.5	0.0245254	30.5841	1.95432	0.329263	19.7574	444.985	12318.9
CA09-29.1	303.611	95.5288	3.26298	4.32624	0.103772	0.614317	3.26582	4.32636	0.103016	0.678784	4.34924	4.37929	0.306202	4.32636	0.987915	1726.76	72.8617	1678.35	12.5386	-2.96314	1678.35	12.5386	1205.48	0.247964	22.9304	2.25983	0.315329	21.6819	414.571	11197.6
CA09-4.1	228.432	66.441	3.19665	2.33506	0.106407	0.72083	3.19609	2.33512	0.106559	0.733629	4.59698	2.44765	0.312882	2.33512	0.954025	1756.52	40.0913	1740.57	13.4458	-0.938777	1740.57	13.4458	873.489	0.0393083	12.9522	1.74579	0.863627	16.9521	298.129	8427.58
CA09-28.1	187.075	36.2884	3.11635	2.74135	0.114216	0.71423	3.1169	2.74141	0.114062	0.727935	5.04568	2.83641	0.320832	2.74141	0.966507	1785.01	47.9034	1864.33	13.1401	4.3336	1864.33	13.1401	1567.29	0.0240904	2.27156	1.86676	0.133604	23.5903	489.924	11353.5
CA09-16.1	631.754	181.773	2.91349	3.88049	0.110966	0.854806	2.91289	3.88051	0.111146	0.857069	5.26103	3.97403	0.343301	3.88051	0.976467	1914.01	73.3447	1817.45	15.5595	-5.40785	1817.45	15.5595	848.246	0.0503737	61.8288	3.66658	0.944368	25.0657	258.631	12676.1

## Sheet: CA03
			Total				204Pb-corrected									207Pb-corrected		204Pb-corrected			Preferred Age
Spot Name	U (ppm)	Th (ppm)	238U/206Pb	% err	207Pb/206Pb	% err	238U/206Pb*	% err	207Pb*/206Pb*	% err	207Pb*/235U	% err	206Pb*/238U	% err	err corr	206Pb/238U Age (Ma)	± 1s	206Pb/207Pb Age (Ma)	± 1s	% discordant	Age (Ma)	± 1s	Y (ppm)	La (ppm)	Ce (ppm)	Sm (ppm)	Eu (ppm)	Gd (ppm)	Yb (ppm)	Hf (ppm)
CA03-42.1	49.5374	80.7528	77.699	1.90972	0.0486685	12.9812	83.8027	4.92517	0.0135728	168.81	0.0223313	168.882	0.0119328	4.92517	0.0291634	82.335	1.6966				82.335	1.6966	700.979	0.0880836	23.644	4.8901	1.60058	29.8149	187	9030.16
CA03-52.1	21.4928	5.8424	77.0113	5.39938	0.0359861	19.8713	86.729	10.4522	0.0656113	38.0963	0.104307	39.5041	0.0115302	10.4522	0.264585	84.3906	4.59748	793.086	799.111	91.1927	84.3906	4.59748	231.514	0.0279376	1.34976	1.26607	0.45216	10.2421	58.5732	8154.14
CA03-47.1	246.529	139.841	70.1523	2.36099	0.0478309	5.50801	69.54	2.44034	0.0547586	10.0699	0.108572	10.3613	0.0143802	2.44034	0.235524	91.2461	2.16516	401.406	225.57	77.6175	91.2461	2.16516	744.03	0.061694	22.9278	2.6649	0.774405	22.1312	249.335	10079.5
CA03-20.1	395.863	200.733	70.0577	1.21989	0.0460535	4.51629	70.0577	1.21989	0.0460535	4.51629	0.0906377	4.67814	0.014274	1.21989	0.260764	91.5724	1.13701	-0.627258	108.875	14770.3	91.5724	1.13701	748.457	0.0123925	24.5882	2.5689	1.01121	19.926	273.001	10012.3
CA03-12.1	558.989	162.501	67.4935	1.17592	0.0541037	8.12145	68.0296	1.24118	0.0478473	11.3628	0.0969754	11.4304	0.0146995	1.24118	0.108586	94.0773	1.21846	90.6963	269.254	-3.7462	94.0773	1.21846	976.934	0.0563492	13.2426	1.83305	0.256051	17.195	354.53	10354.4
CA03-19.1	344.162	234.792	67.4659	4.63618	0.0453873	4.7098	67.8785	4.6563	0.0405171	10.0656	0.0823016	11.0904	0.0147322	4.6563	0.419849	95.1519	4.39694	-319.015	258.251	130.512	95.1519	4.39694	1093.56	0.0302616	22.2312	4.62777	1.01714	36.4035	308.674	10888.7
CA03-15.1	551.54	145	66.9705	2.75889	0.0484423	3.60817	66.5832	2.77903	0.0530306	5.95046	0.109815	6.56742	0.0150188	2.77903	0.423154	95.4864	2.62964	329.118	135.005	71.3274	95.4864	2.62964	346.517	0.00729097	15.651	0.551516	0.124237	5.87375	141.716	12948.5
CA03-11.1	493.583	193.37	66.9459	2.17582	0.0462962	3.78978	67.3557	2.20433	0.0414267	8.0491	0.0848022	8.34549	0.0148466	2.20433	0.264135	95.7784	2.08421	-262.381	204.186	137.224	95.7784	2.08421	687.878	0.0165084	13.115	1.31953	0.331814	13.6498	268.936	11636.3
CA03-30.1	1005.71	615.053	64.8441	1.67061	0.0493871	2.62344	64.8441	1.67061	0.0493871	2.62344	0.105013	3.1102	0.0154216	1.67061	0.537139	98.4849	1.6447	165.231	61.3123	40.6011	98.4849	1.6447	1298.86	0.0204695	31.115	2.89863	0.613864	30.0386	415.183	11774
CA03-6.1	78.3974	29.2219	63.1366	7.33286	0.0568857	8.41975	65.4851	7.64115	0.0276768	65.7263	0.0582741	66.1689	0.0152707	7.64115	0.115479	100.183	7.33329				100.183	7.33329	282.947	0.0160562	2.47727	1.10842	0.675747	8.00211	104.077	7489.54
CA03-37.1	585.758	192.588	63.7987	2.54055	0.0450711	3.58876	63.9143	2.547	0.0436261	4.98079	0.0941129	5.59423	0.0156459	2.547	0.455291	100.632	2.55135	-132.826	123.166	176.719	100.632	2.55135	668.976	0.0108529	15.8298	1.67635	0.407233	15.4357	231.473	9546.78
CA03-28.1	525.026	262.827	63.0861	1.18349	0.0507197	3.41921	63.202	1.19765	0.0492663	4.60128	0.107478	4.75459	0.0158223	1.19765	0.251893	101.046	1.20981	159.506	107.65	36.8424	101.046	1.20981	971.386	0.015016	15.9697	1.86985	0.351975	20.4312	318.35	11286
CA03-39.1	147.656	34.1858	60.7724	5.06814	0.0416222	7.51773	60.7724	5.06814	0.0416222	7.51773	0.0944323	9.06655	0.0164548	5.06814	0.558993	106.07	5.36209	-250.447	190.254	143.182	106.07	5.36209	222.556	0.010419	1.5993	0.397068	0.139324	3.59174	113.081	7922.85
CA03-46.1	681.977	446.967	55.9974	2.65987	0.0496329	2.94343	56.0712	2.66313	0.0485874	3.70228	0.119477	4.56061	0.0178345	2.66313	0.583942	113.917	3.01941	126.943	87.1401	10.3221	113.917	3.01941	2516.59	0.0232202	30.0787	7.10333	0.873954	63.9912	725.154	10824.7
CA03-17.1	169.072	56.7093	54.6888	1.38598	0.0455524	5.98967	55.2391	1.55798	0.0375254	16.9531	0.0936657	17.0245	0.0181031	1.55798	0.0915142	117.223	1.66328	-519.867	453.208	123.365	117.223	1.66328	742.001	0.0122733	7.4832	1.04755	0.203736	12.4227	289.268	10760.6
CA03-54.1	996.397	591.822	45.0731	2.54243	0.0499086	1.78546	45.1939	2.54596	0.0477784	2.91445	0.145765	3.86987	0.0221269	2.54596	0.657893	141.278	3.56932	87.2798	69.1051	-62.3237	141.278	3.56932	1849.14	0.155446	45.0607	3.37495	0.572002	35.659	672.332	10684.4
CA03-2.1	17.4691	3.89322	44.1145	6.82576	0.0312355	20.6713	49.2296	9.56728	0.0631556	34.5479	0.176883	35.8482	0.020313	9.56728	0.266883	147.688	10.0719	712.549	734.188	82.6198	147.688	10.0719	289.829	0.00596965	1.2693	0.377823	0.169186	3.7653	165.785	8785.35
CA03-50.1	350.869	363.609	43.0476	2.22381	0.0484246	3.6963	43.2198	2.24172	0.0452369	6.38832	0.144315	6.77023	0.0231375	2.24172	0.331115	148.149	3.28619	-43.9371	155.283	440.63	148.149	3.28619	1943.1	0.0439246	142.095	1.80835	0.22509	19.711	850.919	13211.1
CA03-40.1	393.246	653.764	41.997	2.07776	0.0535359	3.23106	42.0688	2.08477	0.0521831	4.2153	0.17103	4.70266	0.0237706	2.08477	0.443317	150.86	3.12745	292.449	96.2658	48.7823	150.86	3.12745	3870.82	0.115917	220.33	12.707	1.38198	107.049	1118.7	8684.47
CA03-29.1	56.8352	11.3554	41.3775	3.31636	0.0512013	8.44219	41.8252	3.48851	0.0426035	22.8348	0.140446	23.0997	0.023909	3.48851	0.15102	153.549	5.1198	-191.816	571.223	181.553	153.549	5.1198	538.581	0.0120466	2.63656	0.478591	0.445743	4.8929	327.1	10048
CA03-34.1	24.9314	6.63476	40.1885	2.63297	0.0734206	11.5718	41.3898	3.98442	0.050335	50.3495	0.167679	50.5069	0.0241605	3.98442	0.0788886	153.67	4.35062	209.484	1167.22	26.8527	153.67	4.35062	741.805	0.00310024	2.71758	0.673964	0.295966	8.48165	386.518	9592.38
CA03-53.1	614.599	754.141	40.9918	2.39901	0.0530407	2.1804	40.9918	2.39901	0.0530407	2.1804	0.178408	3.24181	0.0243951	2.39901	0.74002	154.626	3.68698	329.552	49.4654	53.4896	154.626	3.68698	3677.68	0.173178	34.7841	3.9341	1.36408	56.5338	1439.75	11160.4
CA03-23.1	133.537	64.3353	40.7528	1.48695	0.0498495	5.8292	40.3455	1.64638	0.0578048	10.8449	0.197547	10.9692	0.0247859	1.64638	0.150092	156.147	2.3717	521.416	237.943	70.5791	156.147	2.3717	1655.21	0.00594656	13.1103	1.17949	0.407747	19.2162	871.785	12446.6
CA03-55.1	43.3116	19.1972	40.4152	2.81214	0.0515127	24.547	40.9595	3.11822	0.0408137	41.1369	0.137389	41.2549	0.0244143	3.11822	0.0755843	157.115	5.03621	-300.341	1051.49	153.632	157.115	5.03621	1113.25	0.0770117	5.43031	0.852781	0.577187	12.2484	584.316	9592.08
CA03-27.1	146.475	38.9937	40.1164	1.42833	0.0563631	5.14517	39.9377	1.49621	0.0598809	7.57985	0.206731	7.72611	0.025039	1.49621	0.193657	157.317	2.30146	598.331	164.156	74.2556	157.317	2.30146	661.024	0.00254798	3.82179	0.613562	0.319182	8.39394	379.232	11317.4
CA03-13.1	31.9325	11.8489	40.4062	2.25893	0.0459448	11.9864	41.1988	2.99215	0.0302505	56.0742	0.101239	56.1539	0.0242726	2.99215	0.0532847	158.242	3.70667	-1134.76	1713.39	115.038	158.242	3.70667	847.792	0.00579441	3.3692	1.26116	0.591881	13.8589	392.328	9201.87
CA03-43.1	22.8992	5.85119	39.7557	5.34576	0.0571858	12.7313	43.1057	7.23161	0.00928575	334.25	0.0297018	334.329	0.0231988	7.23161	0.0216303	158.569	8.53248				158.569	8.53248	402.053	0.0196168	1.83372	0.326284	0.157972	4.68319	231.227	8773.83
CA03-21.1	62.6293	18.535	39.8006	6.71747	0.0489305	8.1302	39.4237	6.78391	0.0564794	14.9666	0.19753	16.4323	0.0253654	6.78391	0.41284	160.035	10.6919	470.301	331.267	66.4844	160.035	10.6919	484.119	0.0694232	1.88903	0.617028	0.595974	6.46759	224.928	7619.79
CA03-33.1	42.783	12.377	39.9744	5.04702	0.0442262	10.3683	41.1643	5.46868	0.0203554	88.5179	0.0681805	88.6867	0.0242929	5.46868	0.0616629	160.278	8.07444				160.278	8.07444	717.37	0.0097713	3.43811	0.712369	0.342568	8.57654	393.743	9354.04
CA03-3.1	17.9689	4.56778	40.3127	7.47737	0.0357419	19.4634	36.6223	9.16089	0.10993	35.908	0.413879	37.0582	0.0273058	9.16089	0.247203	160.612	11.9893	1797.46	653.487	91.5089	160.612	11.9893	517.409	0.0424002	2.22189	0.4514	0.164741	5.84248	279.912	9055
CA03-22.1	260.912	98.6116	39.1161	1.287	0.0507025	3.86605	39.2995	1.32904	0.0469717	7.03011	0.164797	7.15463	0.0254456	1.32904	0.185759	162.454	2.11112	46.7498	167.964	-249.603	162.454	2.11112	3510.17	0.0935851	21.4852	5.14066	0.870931	62.6087	959.74	7679.02
CA03-26.1	187.635	142.729	39.1421	2.40335	0.0470945	10.9952	39.1421	2.40335	0.0470945	10.9952	0.165893	11.2548	0.0255479	2.40335	0.21354	163.077	4.02547	52.9831	262.391	-209.564	163.077	4.02547	7642.86	0.107058	42.361	17.0014	4.32675	153.873	2786.82	11214.8
CA03-44.1	80.3155	45.0321	39.287	1.65903	0.0430035	8.19817	38.9545	1.8625	0.0498026	15.2496	0.176277	15.3629	0.025671	1.8625	0.121234	163.305	2.77914	184.777	355.121	11.718	163.305	2.77914	1086.73	0.0369416	4.18873	1.6843	1.0788	19.5818	458.663	8211.67
CA03-9.1	78.3195	26.7184	39.0958	6.75421	0.0452285	7.54372	39.0958	6.75421	0.0452285	7.54372	0.159508	10.1256	0.0255782	6.75421	0.667045	163.646	10.9826	-44.389	183.383	472.741	163.646	10.9826	1310.52	0.00895143	5.13514	0.900788	0.440006	11.7072	691.154	8328.6
CA03-38.1	15.5719	4.09628	37.9137	3.09916	0.0674424	15.6813	37.9137	3.09916	0.0674424	15.6813	0.245266	15.9847	0.0263757	3.09916	0.193884	164.066	5.5048	850.561	325.937	81.2996	164.066	5.5048	563.122	0.0135133	2.7589	0.656806	0.416077	9.25163	231.497	8889.76
CA03-1	45.1094	15.1606	38.5098	2.0197	0.0526642	9.25173	40.1271	3.15673	0.0193287	107.083	0.0664151	107.13	0.0249208	3.15673	0.0294664	164.587	3.44516				164.587	3.44516	1190.41	0.00620572	7.09743	0.969988	0.457394	13.6714	547.619	9998.76
CA03-7.1	143.419	88.0036	38.2435	1.44388	0.0530378	5.16156	38.5779	1.57069	0.0461009	12.2925	0.164768	12.3924	0.0259216	1.57069	0.126746	165.646	2.43831	1.8522	296.198	-8920.49	165.646	2.43831	1182.59	0.0441051	8.62233	0.960991	0.198447	14.5778	506.999	12409.8
CA03-24.1	315.113	287.496	38.4227	1.2534	0.0477761	8.1182	38.342	1.27085	0.0494525	8.52638	0.177834	8.62057	0.026081	1.27085	0.147421	165.964	2.21199	168.326	199.157	1.41551	165.964	2.21199	2919.15	0.00541356	6.79413	2.43929	0.941102	43.1512	943.987	11008
CA03-31.1	77.9192	25.3104	37.6961	1.69456	0.058337	6.80132	38.3205	2.06016	0.0452794	22.5663	0.162919	22.6601	0.0260957	2.06016	0.0909155	166.918	2.9256	-41.6524	548.285	505.181	166.918	2.9256	1959.95	0.0183791	6.11977	2.53707	0.574235	36.621	643.199	8730.4
CA03-10.1	133.447	72.5964	38.1885	1.45298	0.0478544	5.75751	38.0072	1.52857	0.051646	9.03246	0.187358	9.16088	0.0263108	1.52857	0.166858	166.957	2.47207	268.771	207.156	38.2005	166.957	2.47207	598.273	0.00458569	7.12479	2.19327	0.391323	17.0768	190.078	9144.33
CA03-4.1	35.7876	9.06559	37.9579	4.08402	0.0508778	9.97828	38.5536	4.3753	0.0383899	35.6717	0.137295	35.9391	0.0259379	4.3753	0.121742	167.332	6.85782	-459.36	941.752	137.712	167.332	6.85782	422.328	0.0153319	3.03559	0.408204	0.239384	4.83225	247.321	9123.64
CA03-5.1	31.9938	11.7546	37.6745	2.31711	0.0523106	11.4026	37.6745	2.31711	0.0523106	11.4026	0.191445	11.6356	0.0265432	2.31711	0.199139	168.279	4.06374	298.019	260.144	43.9018	168.279	4.06374	812.171	0.00907608	2.78388	1.58191	0.948381	17.9286	285.375	7240.76
CA03-51.1	182.685	85.4743	37.9781	2.06684	0.0452136	5.00336	37.8491	2.09456	0.0479357	7.35876	0.174624	7.65105	0.0264207	2.09456	0.273761	168.424	3.48323	95.0659	174.232	-77.8407	168.424	3.48323	3536.85	0.0205909	13.1788	5.23644	1.56396	62.8598	1460.83	9514.59
CA03-25.1	35.983	15.1222	37.29	7.35518	0.0584232	10.0518	36.6362	7.56139	0.0722448	20.4266	0.271893	21.7812	0.0272954	7.56139	0.347153	168.702	12.3647	991.96	415.339	83.5914	168.702	12.3647	1795.1	0.017836	5.07495	3.04513	0.926351	33.7008	588.985	10050.1
CA03-36.1	62.1236	20.4869	36.7037	3.51034	0.0497896	7.91246	37.7613	3.88486	0.0268187	53.0922	0.0979247	53.2342	0.0264822	3.88486	0.0729769	173.234	6.08699				173.234	6.08699	964.752	0.181804	5.45574	0.686768	0.20947	12.1179	449.598	10616.9
CA03-16.1	50.12	18.7344	36.7642	1.98266	0.0408074	9.93462	37.629	2.5882	0.0218427	65.6654	0.0800358	65.7164	0.0265753	2.5882	0.0393844	174.882	3.5453				174.882	3.5453	2347.34	0.0196009	8.759	1.80105	0.948777	26.25	1135.96	10073.4
CA03-45.1	20.3548	7.73865	35.7315	2.67995	0.0612803	12.6651	36.8068	4.03063	0.0376307	68.1595	0.140966	68.2785	0.0271689	4.03063	0.0590321	175.364	4.96402	-512.387	1819.29	135.558	175.364	4.96402	910.644	0.0108964	3.4815	0.842096	0.384834	11.8161	447.338	9092.79
CA03-49.1	191.63	57.8107	5.67397	1.35294	0.0734411	1.48807	5.67905	1.35442	0.0726893	1.67341	1.7648	2.15285	0.176086	1.35442	0.629129	1047.35	13.7218	1004.42	33.9613	-4.43695	1004.42	33.9613	180.524	0.259399	25.2988	0.607609	0.302006	5.06373	73.871	11814.5
CA03-35.1	17.6552	14.7662	5.31446	2.88927	0.0719285	13.4774	5.36148	2.95624	0.0644375	17.2957	1.65712	17.5466	0.186516	2.95624	0.16848	1117.44	33.4564	755.103	365.023	-50.0871			504.213	0.0186835	30.8921	2.4041	1.53276	18.9549	143.076	9947.44
CA03-48.1	134.063	133.667	5.01515	2.97822	0.0811046	1.56518	5.01515	2.97822	0.0811046	1.56518	2.22978	3.36446	0.199396	2.97822	0.885201	1169.3	33.5851	1223.12	30.7524	4.56414	1223.12	30.7524	663.748	0.41491	33.2745	2.64619	0.288452	20.9772	213.087	7650.73
CA03-41.1…dup1	92.4865	31.4697	4.25006	1.50544	0.0908538	1.61236	4.26079	1.51072	0.0887112	2.05096	2.87072	2.54729	0.234698	1.51072	0.593068	1356.41	19.8155	1397.1	39.3223	3.01809	1397.1	39.3223	526.946	0.013647	6.28073	1.3606	0.228683	12.9301	173.292	6820.78
CA03-41.1	92.009	34.0659	4.08966	1.57734	0.0875578	1.61108	4.08479	1.57959	0.0885777	1.78646	2.98989	2.38465	0.24481	1.57959	0.662398	1412.95	21.6218	1394.21	34.2648	-1.39358	1394.21	34.2648	612.32	0.0226532	7.0603	1.97908	0.318628	15.763	210.913	8467.04
CA03-32.1	711.2	555.921	3.97571	1.15838	0.0899001	0.568375	3.97541	1.1584	0.0899656	0.572562	3.1203	1.29218	0.251547	1.1584	0.896473	1448.19	16.2193	1423.97	10.9372	-1.76253	1423.97	10.9372	3897.99	0.111958	46.2656	12.1592	1.61835	102.253	1185.36	10093.6
CA03-18.1	420.765	205.058	3.95726	2.18444	0.0898957	0.716784	3.95822	2.18451	0.0896881	0.737033	3.12418	2.30549	0.252639	2.18451	0.947523	1454.71	30.7055	1418.06	14.0903	-2.67854	1418.06	14.0903	1049.71	0.0121754	63.7457	2.2315	0.563849	21.706	405.144	11978.3
CA03-14.1	160.873	66.4509	3.49396	2.54567	0.10203	1.07562	3.49814	2.54637	0.100999	1.20214	3.98088	2.81587	0.285866	2.54637	0.904292	1618.78	40.0413	1641.74	22.3103	1.43959	1641.74	22.3103	1542.67	0.0416582	19.691	2.55273	0.375086	28.9191	568.963	11813.3
CA03-8.1	1737.2	474.38	3.43598	1.58451	0.105675	1.43611	3.43614	1.58451	0.105633	1.43702	4.23866	2.13909	0.291024	1.58451	0.74074	1638.57	25.3718	1724.55	26.3903	5.11797	1724.55	26.3903	1744.44	76.4951	51.7972	15.6571	7.54733	56.2707	594.563	12848.2

## Sheet: CA05
			Total				204Pb-corrected									207Pb-corrected		204Pb-corrected			Preferred Age
Spot Name	U (ppm)	Th (ppm)	238U/206Pb	% err	207Pb/206Pb	% err	238U/206Pb*	% err	207Pb*/206Pb*	% err	207Pb*/235U	% err	206Pb*/238U	% err	err corr	206Pb/238U Age (Ma)	± 1s	206Pb/207Pb Age (Ma)	± 1s	% discordant	Age (Ma)	± 1s	Y (ppm)	La (ppm)	Ce (ppm)	Sm (ppm)	Eu (ppm)	Gd (ppm)	Yb (ppm)	Hf (ppm)
CA05-80.1	227.333	56.2707	436.138	7.40198	0.0527844	11.1138	473.509	8.90873	0.0143777	173.543	0.00418662	173.771	0.00211189	8.90873	0.051267	14.6436	1.0886				14.6436	1.0886	997.192	0.0254037	8.75253	1.40246	1.01826	19.3686	392.203	10139.2
CA05-30.1	268.067	82.5798	360.176	4.52609	0.0518835	11.395	383.946	5.91845	8.06316e-05	40337.9	2.89559e-05	40337.9	0.00260453	5.91845	0.000146722	17.7495	0.813638				17.7495	0.813638	1842.61	0.0606295	18.7815	3.17682	1.69329	42.4727	571.291	10422.7
CA05-26.1	290.237	206.875	363.281	1.26041	0.0434586	26.1812	371.016	2.4748	0.0265664	78.3107	0.00987283	78.3498	0.0026953	2.4748	0.0315865	17.7866	0.339279				17.7866	0.339279	1918.28	0.0323293	14.114	4.11247	0.719245	48.7502	539.086	9015.8
CA05-14.1	156.838	38.564	354.338	6.90872	0.0443935	16.9376	342.493	7.67564	0.070884	37.5654	0.0285363	38.3416	0.00291977	7.67564	0.200191	18.2136	1.26891	953.179	768.387	98.1677	18.2136	1.26891	932.478	0.0182366	9.15448	1.32343	0.609586	17.0147	332.977	10397.5
CA05-32.1	268.738	165.014	323.307	13.2048	0.0751106	162.12	352.978	13.9811	0.00519668	2661.81	0.00202992	2661.85	0.00283304	13.9811	0.00525239	19.1871	3.97406				19.1871	3.97406	1346.94	0.0789695	7.69943	2.51702	0.383217	29.1928	420.485	9616.04
CA05-40.1	3234.13	3017.11	320.311	1.86342	0.0467831	3.09144	322.57	1.88994	0.0412091	7.04323	0.0176145	7.29239	0.0031001	1.88994	0.259166	20.0857	0.375681	-275.755	179.147	107.403	20.0857	0.375681	4802.39	0.640922	267.205	3.86753	0.387776	44.7381	1929.89	15749.9
CA05-43.1	332.237	136.276	109.494	1.74968	0.0466869	6.12807	109.494	1.74968	0.0466869	6.12807	0.0587903	6.37296	0.00913293	1.74968	0.274548	58.6457	1.04448	32.1969	146.815	-82.402	58.6457	1.04448	740.255	0.142457	17.114	1.38087	0.495257	15.341	270.759	10814.9
CA05-48.1	125.605	84.0381	73.7433	1.46744	0.0478821	8.28882	73.7433	1.46744	0.0478821	8.28882	0.0895265	8.41771	0.0135605	1.46744	0.174328	86.8172	1.33989	92.4167	196.35	6.08646	86.8172	1.33989	543.286	0.0142994	18.061	2.5374	0.895814	21.3305	152.009	11136.4
CA05-31.1	269.967	147.335	72.999	1.27439	0.0495273	5.41268	73.3237	1.34981	0.0460049	9.66495	0.0865089	9.75875	0.0136382	1.34981	0.138318	87.5175	1.14874	-3.17624	233.108	2868.64	87.5175	1.14874	710.973	0.0813178	38.2523	2.06716	0.939591	16.6803	248.058	11528.6
CA05-36.1	72.5048	46.189	73.0375	1.68039	0.0468728	10.7815	74.2494	2.36174	0.0336911	42.6056	0.0625638	42.671	0.0134681	2.36174	0.0553476	87.7633	1.56968	-817.149	1213.3	111.313	87.7633	1.56968	565.289	0.0224637	14.6011	2.2758	1.04122	17.8036	174.198	9270.97
CA05-73.1	250.392	112.972	72.3147	3.92097	0.0483157	10.519	73.2005	3.98429	0.0386007	19.8522	0.0727081	20.2481	0.0136611	3.98429	0.196773	88.4763	3.49896	-444.925	522.555	120.484	88.4763	3.49896	781.159	0.0466675	21.48	1.91325	1.10243	16.2999	288.455	9113.39
CA05-42.1	493.974	461.62	71.7232	2.63968	0.0479014	3.75026	72.0153	2.65535	0.0446692	6.53456	0.0855233	7.05346	0.0138859	2.65535	0.37646	89.249	2.35354	-74.7256	159.78	220.487	89.249	2.35354	2089.47	0.0734312	65.5827	10.7906	5.33172	74.154	654.184	9835.85
CA05-70.1	970.086	299.034	71.2769	2.44526	0.0511642	2.16077	71.3494	2.44737	0.0503611	2.7161	0.097321	3.65607	0.0140155	2.44737	0.6694	89.4376	2.18036	210.687	62.9518	57.8134	89.4376	2.18036	1605.14	0.0503151	40.1793	3.09718	1.45245	38.0684	484.813	12187.6
CA05-13.1	543.328	393.389	70.8576	1.17697	0.0529978	7.57383	71.4935	1.25961	0.0459226	11.7561	0.0885648	11.8233	0.0139873	1.25961	0.106535	89.7566	1.14561	-7.49753	283.777	1303.33	89.7566	1.14561	1124.18	0.210034	63.036	4.05567	1.59124	33.4756	356.407	10341.5
CA05-61.1	764.42	135.12	71.0054	1.54768	0.0487159	3.06686	71.0054	1.54768	0.0487159	3.06686	0.0945976	3.43525	0.0140834	1.54768	0.450528	90.0548	1.39747	133.155	72.1012	32.5199	90.0548	1.39747	1015.03	0.0663545	23.7021	1.72022	0.521368	22.2138	303.635	13755.6
CA05-29.1	961.227	902.893	70.5666	1.57024	0.0473988	2.90406	70.8298	1.58494	0.0444368	4.95878	0.0865024	5.20591	0.0141184	1.58494	0.30445	90.7621	1.42706	-87.4951	121.549	204.728	90.7621	1.42706	1101.78	0.0446899	76.8772	4.72002	1.82196	36.9499	329.624	11611.2
CA05-56.1	856.169	446.443	69.9981	1.15335	0.0479149	3.22345	70.4306	1.19402	0.043011	6.77956	0.0842014	6.8839	0.0141984	1.19402	0.17345	91.4365	1.0644	-168.062	168.805	155.174	91.4365	1.0644	1982.27	60.5973	125.701	2.96739	1.3109	65.1953	630.426	11967.1
CA05-2.1	105.278	72.7111	69.8448	1.58513	0.0454448	9.28861	69.0693	1.93536	0.0542841	17.8469	0.108365	17.9515	0.0144782	1.93536	0.107811	91.9201	1.52904	381.878	401.152	76.2764	91.9201	1.52904	1186.66	0.0529067	25.5452	3.45936	1.47111	29.6313	389.47	9938.13
CA05-65.1	666.126	352.516	68.7857	3.28813	0.0491408	2.55662	69.0676	3.29664	0.0458928	4.93894	0.0916161	5.93809	0.0144786	3.29664	0.555168	92.8974	3.04336	-9.06165	119.255	1130.72	92.8974	3.04336	761.694	0.0251655	27.0807	1.84102	0.761482	20.3577	222.62	11871.1
CA05-71.1	323.065	98.9576	68.8655	3.67826	0.0442282	3.95733	69.0681	3.69001	0.0418813	7.01123	0.0836073	7.92298	0.0144785	3.69001	0.465736	93.3626	3.42352	-234.767	176.884	140.484	93.3626	3.42352	219.438	0.0188045	11.6776	0.353297	0.174947	4.38122	98.3423	11761.4
CA05-12.1	332.387	187.286	68.0231	4.30076	0.0453164	4.78339	68.2414	4.31273	0.0427598	7.86409	0.0863951	8.96903	0.0146539	4.31273	0.480846	94.3847	4.04742	-182.664	196.37	152.451	94.3847	4.04742	643.29	0.0890921	29.7616	2.18909	0.849099	18.2001	226.459	11199.1
CA05-52.1	91.7192	57.8358	66.5649	2.79545	0.0558289	8.39916	65.7863	3.03036	0.0650223	15.6882	0.136279	15.9782	0.0152007	3.03036	0.189656	95.1754	2.70703	774.142	330.08	88.0869	95.1754	2.70703	673.292	0.0398984	11.3621	2.17659	1.06818	17.0385	256.686	8505.63
CA05-25.1	723.091	272.223	66.7659	1.93754	0.0476235	3.19147	66.6669	1.9432	0.0488015	3.93446	0.100931	4.38817	0.0149999	1.9432	0.442828	95.8759	1.85737	137.281	92.4277	30.311	95.8759	1.85737	665.269	0.00825286	19.6674	1.65278	0.414126	15.0357	247.305	10641.9
CA05-68.1	242.513	155.738	66.6431	2.44454	0.0487972	4.29179	67.6413	2.55678	0.0369183	17.3205	0.0752543	17.5082	0.0147839	2.55678	0.146033	95.9105	2.34646	-563.672	467.283	117.657	95.9105	2.34646	494.686	0.0190027	20.3432	1.54693	0.573039	11.8609	174.414	10893.8
CA05-15.1	179.884	104.095	65.2532	1.35681	0.0511528	6.09271	65.6389	1.48003	0.0464774	12.1617	0.0976296	12.2514	0.0152349	1.48003	0.120805	97.6537	1.37273	21.4126	291.963	-357.895	97.6537	1.37273	1011.02	0.0622642	29.1006	7.68176	5.39184	47.3978	258.95	7248.1
CA05-78.1	342.893	273.302	64.6096	3.18731	0.0496832	3.57152	64.7847	3.1988	0.0475363	5.87541	0.101171	6.68975	0.0154357	3.1988	0.478165	98.8037	3.14074	75.2179	139.628	-31.5191	98.8037	3.14074	1230.25	0.0527439	14.8062	4.34998	0.782968	39.354	303.028	10097.8
CA05-24.1	154.429	11.8984	63.9573	1.39681	0.048611	6.93351	63.5074	1.56399	0.0541935	11.9491	0.117659	12.051	0.0157462	1.56399	0.129781	99.9406	1.45152	378.12	268.763	73.9345	99.9406	1.45152	142.13	0.00239796	3.41209	0.169535	0.10954	2.21895	64.9273	9859.97
CA05-67.1	180.319	57.2372	63.5004	4.4503	0.0507256	4.4618	65.4315	4.59658	0.0266562	36.2654	0.0561711	36.5555	0.0152832	4.59658	0.125742	100.389	4.4535				100.389	4.4535	614.43	0.0308219	7.37596	1.07146	0.695785	9.90624	304.167	9327.23
CA05-76.1	279.239	178.462	63.4718	2.66594	0.0510109	3.82806	63.8748	2.7035	0.0459874	8.87157	0.0992682	9.27435	0.0156556	2.7035	0.291502	100.398	2.67399	-4.09391	214.01	2565.97	100.398	2.67399	1007.52	0.431199	25.5771	2.52703	0.912124	22.2321	388.723	9844.98
CA05-79.1	98.0203	45.0994	63.5375	3.17573	0.0450828	6.72574	63.5375	3.17573	0.0450828	6.72574	0.0978322	7.4378	0.0157387	3.17573	0.426972	101.042	3.21482	-52.2389	163.745	295.008	101.042	3.21482	731.761	0.0109445	7.64661	1.07963	0.406539	14.0603	268.963	9473.32
CA05-9.1	835.819	678.145	63.0158	5.30387	0.0494377	2.73509	63.0158	5.30387	0.0494377	2.73509	0.108171	5.96756	0.015869	5.30387	0.888784	101.321	5.34842	167.626	63.8938	39.7622	101.321	5.34842	1365.5	0.090956	59.6597	5.43593	2.03169	41.3	473.018	9900.3
CA05-6.1	192.13	59.1389	62.8605	1.3517	0.0495015	6.17522	63.2176	1.46622	0.0449986	12.1641	0.0981437	12.2521	0.0158184	1.46622	0.11967	101.562	1.42005	-56.7912	296.406	280.348	101.562	1.42005	732.957	0.00545606	6.03163	1.56739	0.265329	17.4449	235.37	9992.39
CA05-23.1	157.602	50.9067	57.4439	1.41878	0.048966	6.55757	58.9392	1.92564	0.0283001	39.2418	0.0662042	39.2891	0.0169666	1.92564	0.049012	111.158	1.63048				111.158	1.63048	966.3	0.0255936	5.31862	1.96777	0.398925	22.3201	307.304	9963.43
CA05-35.1	63.5528	26.1214	56.5108	4.16911	0.0478769	9.85868	57.2947	4.3939	0.0368474	33.0154	0.0886735	33.3065	0.0174536	4.3939	0.131923	113.137	4.73648	-568.862	891.675	120.664	113.137	4.73648	788.982	0.0206193	6.06374	1.27513	0.228081	14.9601	255.153	11087
CA05-7.1	268.02	174.166	55.0677	1.8261	0.0492144	4.73394	54.885	1.856	0.0518486	6.76023	0.130252	7.01038	0.0182199	1.856	0.26475	115.89	2.13057	277.742	154.793	58.6158	115.89	2.13057	1114.88	0.0233664	17.9241	3.5729	0.487585	32.534	305.012	11436.8
CA05-63.1	594.243	274.734	52.8272	2.39817	0.0491646	5.42485	52.9525	2.40403	0.0472806	6.32065	0.123111	6.7624	0.0188849	2.40403	0.355499	120.782	2.90657	62.3845	150.571	-94.2015	120.782	2.90657	1775.98	0.0224857	18.0732	2.11579	0.678129	31.2631	653.515	10979.3
CA05-66.1	361.029	131.575	51.47	2.41781	0.0488306	3.09051	51.2665	2.43393	0.0519748	5.14986	0.139785	5.69606	0.0195059	2.43393	0.427301	123.998	2.98803	283.305	117.802	56.5838	123.998	2.98803	1804.37	0.023694	34.003	3.08522	1.15169	31.3161	678.459	9610.89
CA05-77.1	440	303.21	50.6314	2.69734	0.0506298	2.71979	50.8676	2.71076	0.0469289	5.4425	0.127204	6.08022	0.0196589	2.71076	0.445832	125.755	3.37702	44.5688	130.087	-183.363	125.755	3.37702	1480.49	0.101149	32.6583	6.18941	4.04816	42.2828	596.619	9805.38
CA05-16.1	67.0161	27.7778	50.1424	3.17318	0.0429819	9.91303	49.5207	3.40685	0.0529127	20.1725	0.147324	20.4582	0.0201936	3.40685	0.166528	128.189	4.09721	324.067	458.09	60.8316	128.189	4.09721	397.439	0.0132418	13.3353	0.683451	0.399706	8.5237	150.422	9728.05
CA05-11.1	358.389	115.81	46.6896	4.15968	0.0467892	3.91073	46.5882	4.16535	0.0485219	5.18232	0.143603	6.64881	0.0214646	4.16535	0.626481	136.952	5.66529	123.769	122.047	-10.7269	136.952	5.66529	926.186	0.0114777	10.1005	1.59788	0.279783	17.3245	345.674	10036.6
CA05-49.1	108.787	40.5517	44.5436	1.51472	0.046944	6.728	44.8321	1.64742	0.0417749	14.5957	0.128477	14.6883	0.0223054	1.64742	0.112158	143.474	2.22966	-241.192	368.699	160.739	143.474	2.22966	462.296	0.0384514	5.49301	1.22281	0.610253	9.64139	188.141	10598.8
CA05-33.1	335.57	159.759	43.9243	1.23383	0.0514995	3.63616	44.0157	1.25126	0.0498481	5.0192	0.15615	5.17281	0.0227192	1.25126	0.241891	144.658	1.8037	186.902	116.838	22.77	144.658	1.8037	1174.88	0.0144018	14.6996	2.1216	0.890551	23.1346	497.462	9899.22
CA05-54.1	35.8944	22.9807	42.4091	2.19123	0.0529465	10.9442	41.642	2.84159	0.06728	22.5686	0.22277	22.7468	0.0240142	2.84159	0.124923	149.516	3.42739	845.548	469.461	82.8662	149.516	3.42739	4608.28	0.0312911	16.7702	7.52232	2.4151	95.69	1414.78	8999.8
CA05-4.1	172.764	47.9271	41.7146	1.37446	0.0500979	5.0271	41.88	1.43052	0.0469437	8.63243	0.154551	8.75015	0.0238778	1.43052	0.163485	152.528	2.13455	45.3251	206.303	-238.411	152.528	2.13455	547.882	0.0238384	5.52164	0.865471	0.156193	9.66394	211.876	12029.7
CA05-21.1	17.4979	7.44694	40.7538	2.88246	0.0619323	14.0204	40.7538	2.88246	0.0619323	14.0204	0.209532	14.3137	0.0245376	2.88246	0.201378	153.791	4.71179	670.84	299.999	77.6263	153.791	4.71179	944.365	0.0211311	2.72928	1.34255	0.507116	16.8911	370.447	9433.53
CA05-51.1	34.1893	19.1303	40.2448	2.11351	0.0430718	11.471	40.2448	2.11351	0.0430718	11.471	0.147565	11.664	0.0248479	2.11351	0.181199	159.437	3.48105	-164.543	285.419	198.596	159.437	3.48105	1310.52	0.0552744	4.72202	2.22202	0.797673	25.7563	430.812	10353.3
CA05-46.1	466.261	306.652	38.6075	2.99402	0.049008	2.80971	38.5614	2.9964	0.0499594	3.34617	0.178635	4.49169	0.0259327	2.9964	0.667099	164.923	4.90449	192.094	77.8189	14.2636	164.923	4.90449	852.115	0.00510506	39.9597	1.60501	0.817529	15.7308	363.61	10347.7
CA05-53.1	249.213	45.9893	37.9789	1.29235	0.0508647	4.00488	37.9789	1.29235	0.0508647	4.00488	0.184661	4.20824	0.0263304	1.29235	0.307101	167.243	2.1846	233.698	92.4347	28.6777	167.243	2.1846	2281.51	0.0210084	1.29537	2.80601	0.0860738	40.2836	757.402	12558.2
CA05-38.1	80.8681	51.537	37.6408	1.62242	0.0504259	6.85347	37.6408	1.62242	0.0504259	6.85347	0.184712	7.04289	0.0265669	1.62242	0.230363	168.825	2.81099	213.663	158.759	21.1661	168.825	2.81099	899.788	0.0194185	3.89763	1.73867	1.21041	18.6786	393.685	8377.39
CA05-69.1	466.185	434.331	37.4971	2.40708	0.0523738	2.28915	37.4971	2.40708	0.0523738	2.28915	0.192583	3.32178	0.0266687	2.40708	0.724635	169.055	4.0422	300.772	52.2	44.1642	169.055	4.0422	2071.25	0.0491411	62.6567	6.53585	3.10125	50.1286	839.425	9952.48
CA05-20.1	160.753	36.736	36.6259	1.39225	0.0490794	4.82704	36.8858	1.47992	0.0434174	10.7916	0.162295	10.8926	0.0271107	1.47992	0.135865	173.752	2.45161	-144.697	267.474	222.142	173.752	2.45161	1798.64	0.0275453	0.739157	2.56487	0.0273539	30.6785	607.546	12954.8
CA05-60.1	388.753	233.844	36.4542	2.14496	0.0505714	2.96289	36.504	2.14931	0.0494829	3.74794	0.186903	4.32048	0.0273942	2.14931	0.497471	174.24	3.71851	169.759	87.5201	-2.66271	174.24	3.71851	501.973	0.0180799	27.314	0.698144	0.524352	8.80018	238.518	10146.5
CA05-8.1	65.2886	71.6571	36.0333	1.77262	0.0556762	7.21878	37.7012	2.72632	0.0190405	92.7531	0.0696344	92.7932	0.0265243	2.72632	0.0293806	175.137	3.20066				175.137	3.20066	5063.2	0.888674	40.864	10.9405	4.26107	121.026	1439.88	8055.85
CA05-59.1	83.2305	71.4288	36.1315	4.25686	0.0533367	6.33062	36.8545	4.41094	0.0374522	26.6223	0.140116	26.9852	0.0271337	4.41094	0.163457	175.177	7.4275	-525.09	712.471	134.687	175.177	7.4275	2993.48	0.0300941	12.0228	4.77547	1.4121	55.9216	961.915	11494.6
CA05-58.1	185.794	86.1445	35.2707	3.76892	0.0478508	4.56037	35.2707	3.76892	0.0478508	4.56037	0.187058	5.91623	0.0283522	3.76892	0.637048	180.642	6.76354	90.8664	108.06	-99.7271	180.642	6.76354	675.254	0.031572	18.1424	1.12643	0.652373	11.3531	331.145	9162.84
CA05-57.1	153.31	68.796	32.3079	1.38783	0.0467299	4.82449	32.3079	1.38783	0.0467299	4.82449	0.199429	5.02014	0.0309522	1.38783	0.276453	197.315	2.76621	34.4024	115.536	-478.445	197.315	2.76621	796.389	0.018866	11.1904	2.42451	0.842467	20.0056	274.239	9582.03
CA05-17.1	242.17	97.3909	32.1873	2.9031	0.0494887	3.88743	32.1873	2.9031	0.0494887	3.88743	0.211994	4.85182	0.0310682	2.9031	0.598353	197.372	5.69232	170.035	90.773	-16.24	197.372	5.69232	294.495	0.0364118	13.0914	0.554387	0.326109	6.16218	137.424	10864.1
CA05-47.1	256.606	130.195	31.7683	1.27836	0.0510104	3.40037	31.7683	1.27836	0.0510104	3.40037	0.221394	3.63273	0.0314779	1.27836	0.351901	199.572	2.56185	240.296	78.3884	17.1185	199.572	2.56185	771.117	0.0394611	10.4405	2.40613	0.251037	20.518	214.504	11510.4
CA05-81.1	466.141	205.452	28.2158	2.40913	0.0847941	1.70741	29.2462	2.50448	0.0568558	9.90433	0.268044	10.2161	0.0341924	2.50448	0.245151	215.027	5.14016	484.985	218.667	56.2396	215.027	5.14016	821.763	0.285319	25.165	2.04238	0.807709	15.0317	397.026	9342.48
CA05-22.1	1025	25.3605	28.6742	2.53091	0.0659724	3.12611	28.6742	2.53091	0.0659724	3.12611	0.317229	4.0222	0.0348746	2.53091	0.629236	216.777	5.45602	804.589	65.453	73.7657	216.777	5.45602	929.522	0.0215199	1.11196	0.907849	0.0937432	12.6071	288.549	14009.8
CA05-5.1	368.923	321.058	23.4987	4.56654	0.0519107	2.57636	23.4987	4.56654	0.0519107	2.57636	0.304589	5.24318	0.0425555	4.56654	0.870948	268.565	12.1096	280.483	58.9635	4.3059	268.565	12.1096	1361.32	0.00843895	51.5598	3.7174	0.836761	31.4139	463.832	10517.2
CA05-55.1	414.598	169.177	19.7438	1.20233	0.102538	1.53339	19.7438	1.20233	0.102538	1.53339	0.716068	1.94856	0.0506489	1.20233	0.617037	299.051	3.59607	1669.75	28.356	82.8692			1783.6	0.0884901	51.3283	3.38116	1.5233	36.5441	631.744	11748.9
CA05-10.1	480.769	245.28	19.4569	1.62308	0.0521788	2.05856	19.4699	1.62444	0.0516428	2.32604	0.365719	2.83712	0.0513614	1.62444	0.572567	323.365	5.18362	268.628	53.3481	-20.7046			1346.23	0.049431	10.5315	4.02344	0.165211	37.2555	382.563	9928.44
CA05-34.1	215.07	200.191	14.3212	2.63225	0.0644446	2.39404	14.4466	2.65041	0.0574329	5.12898	0.548145	5.77331	0.0692203	2.65041	0.45908	430.447	11.1323	507.238	112.806	15.4446	430.447	11.1323	1241.59	0.156752	32.2669	7.95775	1.62182	48.0527	329.549	9890.52
CA05-45.1	66.0294	59.5246	11.0029	1.7782	0.060473	3.94293	11.0029	1.7782	0.060473	3.94293	0.7578	4.32535	0.0908848	1.7782	0.41111	559.683	9.83553	619.604	85.0882	9.91406	559.683	9.83553	1100.18	0.0271954	21.4633	3.20133	0.962653	27.9504	384.869	9293.9
CA05-44.1	721.191	165.916	6.5954	6.81517	0.0971472	3.89103	6.59719	6.8152	0.0969288	3.90411	2.02579	7.85424	0.15158	6.8152	0.86771	880.629	58.1373	1565.02	73.1816	44.8362			880.59	0.0434812	14.9877	1.73687	0.232891	18.7943	364.139	12527.6
CA05-50.1	363.967	296.857	6.37581	1.22277	0.0896048	1.00109	6.37423	1.22302	0.0898054	1.02328	1.94257	1.59464	0.156882	1.22302	0.766959	918.26	10.8871	1420.56	19.5559	36.3644			1953.56	0.0672662	94.1347	7.65011	2.00637	55.7828	660.139	10930.3
CA05-37.1	185.627	56.7883	4.55292	3.67937	0.0808418	1.28392	4.55455	3.67954	0.0805377	1.34344	2.43812	3.91712	0.219561	3.67954	0.939348	1283.82	45.5333	1209.33	26.4483	-6.40333	1209.33	26.4483	364.218	0.00862016	7.52005	1.25159	0.325418	10.6308	115.237	9562.94
CA05-72.1	826.456	93.3889	4.25542	2.76666	0.0879292	1.86638	4.25569	2.76667	0.0878749	1.86868	2.84705	3.33862	0.234979	2.76667	0.828686	1359.26	36.3447	1378.91	35.9173	1.47773	1378.91	35.9173	228.066	0.0401624	6.25623	0.153403	0.0240966	2.13011	175.458	12751
CA05-19.1	886.354	546.21	4.24171	1.78929	0.0875743	0.534632	4.24143	1.7893	0.0876298	0.537998	2.84866	1.86843	0.23577	1.7893	0.957648	1364.04	23.5437	1373.54	10.3484	0.717089	1373.54	10.3484	1466.11	0.055513	19.3934	4.00101	0.066487	35.0468	464.541	15020.4
CA05-75.1	659.959	71.569	4.19344	2.79344	0.0886204	0.519338	4.19582	2.79352	0.0881363	0.562269	2.89627	2.84954	0.238333	2.79352	0.980339	1377.55	37.1168	1384.62	10.7987	0.529263	1384.62	10.7987	2985.15	0.0368186	1.43753	2.39362	0.0301551	32.9701	1093.63	13561.6
CA05-41.1	71.1788	22.5591	4.0382	1.68856	0.0927241	1.78081	4.0444	1.69204	0.0914149	2.07399	3.11648	2.67665	0.247256	1.69204	0.63215	1422	23.3245	1454.43	39.454	2.30839	1454.43	39.454	410.588	0.0261635	6.34082	0.845721	0.0852013	8.4714	149.063	9663.88
CA05-64.1	504.526	195.701	3.90357	2.40531	0.0893964	0.548089	3.90498	2.40537	0.0890854	0.577242	3.14549	2.47367	0.256083	2.40537	0.972392	1474.85	34.2832	1405.16	11.055	-5.14288	1405.16	11.055	2730.22	0.0252733	35.1185	3.00633	0.558079	39.9251	994.55	13802.9
CA05-62.1	476.349	253.358	3.49915	2.59616	0.0972355	0.566699	3.49915	2.59616	0.0972355	0.566699	3.83145	2.65729	0.285784	2.59616	0.976995	1625.17	40.9681	1570.94	10.6144	-3.56269	1570.94	10.6144	1401.15	0.0213193	34.2937	1.8717	0.202686	21.6532	524.276	13468.3
CA05-39.1	66.4943	51.8284	3.46953	1.73828	0.0980857	1.6673	3.46229	1.74244	0.0998946	1.93842	3.97813	2.60645	0.288826	1.74244	0.668511	1637.08	27.7984	1621.31	36.0697	-1.00195	1621.31	36.0697	738.404	0.0746955	21.0313	2.05291	0.677548	18.1535	252.42	9899.63
CA05-28.1	227.06	40.7242	3.29803	1.31034	0.100331	0.880783	3.29998	1.31078	0.0998142	0.934973	4.17044	1.61007	0.303032	1.31078	0.814115	1715.46	21.9736	1619.81	17.4011	-6.08079	1619.81	17.4011	882.563	0.0702343	5.70192	1.31845	0.186607	13.9148	367.634	12596.4
CA05-74.1	492.981	614.6	3.26879	2.89814	0.107847	0.462367	3.26949	2.89817	0.10766	0.473953	4.54021	2.93667	0.305858	2.89817	0.98689	1715.9	48.4788	1759.39	8.66613	2.53185	1759.39	8.66613	3775.01	0.238311	148.718	22.9568	9.94228	154.515	1056.5	9298.21
CA05-27.1	198.701	88.8808	3.14542	1.33623	0.105086	0.886092	3.14606	1.33639	0.104906	0.904164	4.59763	1.61352	0.317858	1.33639	0.828244	1787.11	23.4402	1711.87	16.6311	-4.50601	1711.87	16.6311	1460.36	0.0240028	9.30027	3.48897	0.415057	38.3125	436.62	11804.4
CA05-18.1	252.535	67.2505	3.0948	1.27551	0.113015	0.740599	3.09527	1.27561	0.112881	0.75096	5.02833	1.48024	0.323073	1.27561	0.861756	1799.63	22.542	1845.52	13.5866	2.53433	1845.52	13.5866	521.719	0.0259404	8.34757	1.00295	0.0988815	12.1541	204.756	11184.9
CA05-1.1	218.835	151.714	2.98145	2.31781	0.10813	0.920396	2.98145	2.31781	0.10813	0.920396	5.0006	2.49386	0.335407	2.31781	0.929404	1876.99	42.875	1767.36	16.8126	-6.33428	1767.36	16.8126	1146.17	0.0872949	10.0701	8.09111	1.10611	52.6759	250.697	9488.69
CA05-3.1	241.45	218.391	2.34113	2.29318	0.180036	1.26286	2.34235	2.29333	0.179597	1.27252	10.5717	2.62272	0.426921	2.29333	0.874409	2200.36	51.6843	2648.43	21.1129	15.9737	2648.43	21.1129	800.106	0.952951	49.6256	13.7321	8.68809	57.2267	176.485	9029.01

## Sheet: VL200
			Total				204Pb-corrected									207Pb-corrected		204Pb-corrected			Preferred Age
Spot Name	U (ppm)	Th (ppm)	238U/206Pb	% err	207Pb/206Pb	% err	238U/206Pb*	% err	207Pb*/206Pb*	% err	207Pb*/235U	% err	206Pb*/238U	% err	err corr	206Pb/238U Age (Ma)	± 1s	206Pb/207Pb Age (Ma)	± 1s	% discordant	Age (Ma)	± 1s	Y (ppm)	La (ppm)	Ce (ppm)	Sm (ppm)	Eu (ppm)	Gd (ppm)	Yb (ppm)	Hf (ppm)
VL200-10.1	322.994	121.248	74.1136	3.25693	0.0516293	4.01438	74.8772	3.31084	0.0434938	11.9284	0.08009	12.3794	0.0133552	3.31084	0.267448	85.9792	2.79677	-140.345	295.402	162	85.9792	2.79677	287.488	0.030198	14.2194	0.657932	0.247055	5.67495	112.913	10153.9
VL200-51.1	633.231	227.635	72.603	2.79078	0.0592406	2.63702	73.2241	2.81689	0.0525511	6.47827	0.0989531	7.06419	0.0136567	2.81689	0.398756	86.9179	2.42088	308.474	147.522	72	86.9179	2.42088	375.858	0.385139	16.8075	0.990015	0.329231	7.49457	152.616	10309.7
VL200-41.1	434.242	174.501	72.7084	2.28877	0.0472792	3.21211	72.8572	2.2979	0.0456541	4.88207	0.0863989	5.39583	0.0137255	2.2979	0.425866	88.1139	2.01446	-21.6724	118.166	509	88.1139	2.01446	487.415	0.04132	15.3557	1.05106	0.354715	10.2912	170.412	11145.2
VL200-3.1	531.54	187.232	72.3341	2.2802	0.0470249	3.01789	72.9988	2.31695	0.0397257	9.04426	0.0750339	9.33632	0.0136989	2.31695	0.248165	88.596	2.017	-369.886	234.445	125	88.596	2.017	253.654	0.0286084	20.7794	0.609758	0.23729	4.64111	121.161	11592.6
VL200-58.1	503.967	139.842	72.0452	4.0953	0.0483876	5.58421	72.1632	4.09857	0.047089	6.37698	0.0899715	7.58052	0.0138575	4.09857	0.540672	88.7978	3.63222	52.7021	152.189	-69	88.7978	3.63222	801.428	0.0284782	18.545	2.15682	0.977577	19.4576	229.282	10638.3
VL200-28.1	341.808	109.197	71.7342	2.30405	0.0497609	3.76428	72.3906	2.36387	0.0425167	10.8795	0.08098	11.1334	0.0138139	2.36387	0.212323	89.0272	2.05246	-196.925	272.431	146	89.0272	2.05246	233.025	0.0159423	15.9028	0.463988	0.184867	4.02759	101.94	11532.6
VL200-65.1	313.788	140.207	71.0098	6.80842	0.0481024	3.48727	71.3456	6.81663	0.0443502	7.11197	0.0857095	9.85122	0.0140163	6.81663	0.691958	90.1187	6.10982	-92.282	174.488	199	90.1187	6.10982	724.377	0.0340602	22.6447	2.16866	0.985715	17.211	253.255	9462.73
VL200-44.1	461.609	216.96	69.706	2.69509	0.0576184	2.87067	70.4028	2.73193	0.0497827	7.86331	0.0974966	8.32437	0.014204	2.73193	0.328184	90.7004	2.44036	183.845	183.146	51	90.7004	2.44036	726.212	0.150611	18.1231	2.91976	0.631515	20.9197	212.403	10261.6
VL200-34.1	1256.03	475.45	70.3472	4.32548	0.048682	1.966	70.3472	4.32548	0.048682	1.966	0.0954163	4.75131	0.0142152	4.32548	0.910377	90.8973	3.91467	131.519	46.2342	31	90.8973	3.91467	1489.77	0.388342	23.7971	3.65673	0.997619	37.4659	411.693	11708
VL200-23.1	660.712	273.635	70.3921	5.17814	0.0473385	2.83987	70.278	5.18068	0.0486259	3.82181	0.0954001	6.43783	0.0142292	5.18068	0.804725	90.9928	4.69193	128.806	89.9222	29	90.9928	4.69193	769.784	0.0306452	30.7119	1.65594	0.410156	13.8939	292.755	10938.1
VL200-31.1	1316.12	292.812	70.19	2.25748	0.0495194	1.90257	70.2972	2.26006	0.0483106	2.6372	0.0947559	3.47313	0.0142253	2.26006	0.650725	91.0041	2.0475	113.482	62.2266	20	91.0041	2.0475	906.54	0.0268314	25.2467	1.02425	0.419994	12.1948	385.533	13512.8
VL200-60.1	900.916	360.228	70.0598	3.18783	0.0487995	1.99604	70.1175	3.1889	0.0481458	2.43856	0.0946745	4.01443	0.0142618	3.1889	0.794359	91.255	2.89739	105.411	57.626	13	91.255	2.89739	1305.96	0.461209	19.5521	2.97668	0.483007	25.7237	457.187	10938.9
VL200-32.1	662.311	170.564	69.6949	2.53872	0.048628	2.62855	69.8951	2.54683	0.0463509	4.44837	0.091435	5.12585	0.0143072	2.54683	0.49686	91.7502	2.32283	14.8642	106.923	-520	91.7502	2.32283	353.025	0.24157	13.0359	0.502032	0.232804	4.54845	179.174	13704.8
VL200-6.1	1277.62	93.4417	69.395	2.77062	0.0480063	2.04819	69.5738	2.77462	0.0459613	3.35169	0.0910852	4.35113	0.0143732	2.77462	0.637677	92.2167	2.54526	-5.46067	80.8744	1798	92.2167	2.54526	1332.75	0.164428	12.9497	1.31883	0.858512	12.483	550.484	13305.7
VL200-47.1	108.416	51.9784	68.7251	2.43112	0.0526323	6.16866	68.7251	2.43112	0.0526323	6.16866	0.105594	6.63044	0.0145507	2.43112	0.36666	92.5712	2.27153	311.987	140.384	71	92.5712	2.27153	832.698	0.0293161	6.11342	3.09103	0.648552	24.3034	241.419	9053.66
VL200-43.1	336.794	117.799	69.1068	4.61923	0.0463449	3.85992	69.3074	4.62834	0.044036	6.65234	0.087605	8.10402	0.0144285	4.62834	0.571117	92.7924	4.27065	-109.754	163.765	185	92.7924	4.27065	631.341	0.036024	8.64983	0.906661	0.163896	10.8033	250.917	11412.3
VL200-63.1	681.663	257.022	68.0384	2.44338	0.0516021	2.13862	68.3095	2.45149	0.0484538	3.98365	0.0978021	4.67753	0.0146393	2.45149	0.5241	93.6225	2.28013	120.461	93.8753	22	93.6225	2.28013	668.475	10.6658	39.2809	2.50502	0.37152	14.5316	246.049	11508.4
VL200-35.1	477.62	125.159	68.0533	2.5639	0.0461286	3.27091	68.1961	2.57247	0.0444595	5.07149	0.089889	5.68662	0.0146636	2.57247	0.452372	94.2472	2.41113	-86.2423	124.281	210	94.2472	2.41113	801.435	0.0454301	15.0642	2.15679	0.379705	19.3191	258.808	10942.3
VL200-62.1	348.955	116.976	67.2757	5.35065	0.0460922	3.20737	67.1417	5.35436	0.0476779	4.53815	0.0979099	7.01883	0.0148939	5.35436	0.762856	95.3355	5.07884	82.285	107.706	-16	95.3355	5.07884	1013.4	0.0204523	13.1155	1.93984	0.497053	19.3323	354.006	8519.1
VL200-25.1	1288.63	801.248	67.2254	2.25739	0.0460364	1.88967	67.2254	2.25739	0.0460364	1.88967	0.0944211	2.94392	0.0148753	2.25739	0.766798	95.4132	2.14568	-1.526	45.5624	6385	95.4132	2.14568	1994	0.0545706	36.2943	7.20703	1.77129	50.5068	669.98	10342.6
VL200-29.1	928.327	315.408	66.0816	2.26405	0.0490362	2.25754	66.0114	2.26655	0.0498786	2.78602	0.104183	3.59154	0.0151489	2.26655	0.631079	96.6923	2.1823	188.328	64.8367	49	96.6923	2.1823	573.119	0.0260793	12.0851	0.873503	0.270865	8.41047	273.786	10879.8
VL200-48.1	1502.64	585.552	65.7975	2.25422	0.0475467	1.67798	65.8355	2.25496	0.0470879	1.95556	0.0986168	2.9848	0.0151894	2.25496	0.75548	97.2893	2.18419	52.6503	46.6707	-85	97.2893	2.18419	2053.83	0.0212611	24.1892	3.77629	0.436876	44.5976	611.344	11629.6
VL200-30.1	798.561	281.408	65.5932	2.26824	0.0494988	2.40311	65.7517	2.27467	0.0475832	3.7978	0.0997809	4.4269	0.0152087	2.27467	0.513831	97.3522	2.20182	77.5606	90.2142	-26	97.3522	2.20182	778.608	0.0235217	14.7992	1.27989	0.216469	13.6562	275.852	11483.7
VL200-14.1	944.343	325.144	65.3225	2.81207	0.0511036	2.10934	65.3225	2.81207	0.0511036	2.10934	0.107867	3.51525	0.0153087	2.81207	0.799961	97.5566	2.73266	244.504	48.5893	60	97.5566	2.73266	1133.3	0.0283213	16.1814	1.6146	0.120384	18.7949	409.44	12991.9
VL200-54.1	731.145	234.755	65.4476	2.47656	0.0481807	2.44069	65.4476	2.47656	0.0481807	2.44069	0.101503	3.47711	0.0152794	2.47656	0.712246	97.7291	2.41233	107.122	57.6579	9	97.7291	2.41233	696.719	0.0203547	11.3773	0.896344	0.208721	10.0271	316.21	11181.3
VL200-38.1	273.62	191.486	65.036	2.31776	0.0484283	4.08409	65.036	2.31776	0.0484283	4.08409	0.102671	4.69593	0.0153761	2.31776	0.493568	98.3139	2.28012	119.219	96.2644	18	98.3139	2.28012	763.246	0.0392387	10.024	2.62646	0.911742	19.1469	224.425	7007.07
VL200-45.1	762.504	336.861	64.3569	2.37387	0.0525552	2.44975	64.4416	2.37752	0.0515157	3.21634	0.110224	3.99968	0.0155179	2.37752	0.594427	98.8321	2.3396	262.973	73.8427	63	98.8321	2.3396	1528.32	0.0472888	7.05862	2.98083	1.18113	31.7608	476.627	7068.65
VL200-20.1	874.915	378.882	64.0843	2.26569	0.0486978	2.24856	64.2193	2.27058	0.0470263	3.43348	0.100966	4.11635	0.0155716	2.27058	0.551602	99.7327	2.2521	49.5238	81.9903	-102	99.7327	2.2521	1136.3	0.0270681	15.0519	1.49825	0.226547	16.552	444.02	10184.8
VL200-39.1	233.2	95.7611	62.7389	3.74272	0.0637462	3.84237	63.7162	3.82298	0.0516204	12.8694	0.111705	13.4252	0.0156946	3.82298	0.284761	99.9383	3.73413	267.631	295.215	63	99.9383	3.73413	771.296	0.479216	14.4195	1.64085	0.609057	16.0436	266.876	9915.19
VL200-64.1	338.586	121.935	62.0931	2.88705	0.0691919	13.8659	63.9722	2.99837	0.0458002	25.7653	0.0987137	25.9392	0.0156318	2.99837	0.115592	100.27	3.13462	-13.9437	622.706	823	100.27	3.13462	589.581	0.757954	13.649	1.39202	0.222005	12.1395	200.805	10276.3
VL200-13.1	290.368	223.488	63.5145	2.86496	0.0472774	4.03721	63.9301	2.90211	0.042075	9.91583	0.0907443	10.3318	0.0156421	2.90211	0.280891	100.802	2.8829	-223.143	249.588	146	100.802	2.8829	1296.91	0.040131	15.9067	6.28638	1.95363	41.7416	358.935	8795.33
VL200-12.1	820.536	259.565	61.9114	2.56702	0.0493636	2.25895	61.9114	2.56702	0.0493636	2.25895	0.109935	3.41942	0.0161521	2.56702	0.750717	103.128	2.6371	164.119	52.8048	37	103.128	2.6371	572.254	0.0377901	12.8732	0.938925	0.301132	8.63215	280.794	11171.7
VL200-49.1	85.651	35.0836	60.2082	4.31247	0.045687	7.25549	60.2082	4.31247	0.045687	7.25549	0.104626	8.44035	0.016609	4.31247	0.510935	106.518	4.58942	-19.9264	175.554	638	106.518	4.58942	538.691	0.0189358	6.5057	1.05396	0.28762	11.9163	169.175	9604.56
VL200-21.1	772.018	790.811	58.7005	2.67016	0.046385	2.39622	58.7668	2.67255	0.0454859	3.14656	0.10672	4.12836	0.0170164	2.67255	0.647362	109.143	2.90179	-30.6124	76.2897	459	109.143	2.90179	4797.9	0.0645478	39.8816	13.5527	2.26613	137.993	1082.56	9537.86
VL200-37.1	299.003	111.708	57.3017	2.31195	0.0508667	3.53974	57.3017	2.31195	0.0508667	3.53974	0.122396	4.22787	0.0174515	2.31195	0.546836	111.167	2.56766	233.791	81.6976	53	111.167	2.56766	1145.03	0.0229932	9.46182	1.77246	0.383975	20.1083	399.037	9763.27
VL200-19.1	80.3111	17.3969	57.3064	3.66977	0.0451814	15.8484	57.3064	3.66977	0.0451814	15.8484	0.108707	16.2677	0.0174501	3.66977	0.225586	111.951	4.20495	-46.92	385.452	341	111.951	4.20495	233.328	0.0211978	7.67254	0.260113	0.227675	3.72784	119.951	12268.7
VL200-4.1	356.652	232.32	54.8074	2.30153	0.0489599	3.30373	54.9304	2.31244	0.0471774	5.11364	0.118419	5.61219	0.0182048	2.31244	0.412039	116.474	2.67495	57.1771	121.936	-104	116.474	2.67495	1044.88	0.0266246	62.2597	2.18066	0.684926	19.8632	377.709	9490.25
VL200-17.1	227.909	55.799	52.6683	2.34299	0.0481081	4.30585	52.0822	2.42953	0.0569595	9.57568	0.150792	9.87909	0.0192004	2.42953	0.245927	121.304	2.84174	489.004	211.265	76	121.304	2.84174	260.009	0.0346582	11.0029	0.224153	0.167765	3.25172	143.482	12071.2
VL200-36.1	384.649	162.989	52.3929	2.29946	0.0482141	3.22419	53.073	2.35976	0.0378902	12.0136	0.098436	12.2431	0.018842	2.35976	0.192742	121.921	2.79593	-494.079	319.446	126	121.921	2.79593	1398.01	0.0382137	26.1203	1.84822	1.28643	19.703	573.902	9061.9
VL200-9.1	195.048	73.9413	50.8129	2.34509	0.0492133	4.04374	50.8129	2.34509	0.0492133	4.04374	0.133539	4.67453	0.01968	2.34509	0.501673	125.531	2.9414	156.987	94.6498	20	125.531	2.9414	975.631	0.133535	10.4048	1.65918	0.408958	16.7757	346.788	9606.67
VL200-57.1	177.159	76.6294	49.1412	2.32927	0.0487364	3.7049	49.1412	2.32927	0.0487364	3.7049	0.136744	4.37627	0.0203495	2.32927	0.532249	129.85	3.01857	134.146	87.0854	3	129.85	3.01857	1031.53	0.00502107	16.7203	1.52891	0.408438	17.2569	386.232	9845.65
VL200-33.1	568.805	353.445	48.2161	3.45643	0.0499516	2.44652	48.3367	3.46095	0.0479654	3.8912	0.136821	5.20765	0.0206882	3.46095	0.664589	132.124	4.54021	96.5343	92.106	-37	132.124	4.54021	487.459	0.0384888	22.9775	1.21133	0.631892	11.7085	191.077	10695
VL200-2.1	236.869	72.073	45.2794	3.10755	0.0505979	3.54638	45.5211	3.13039	0.0463584	7.57745	0.140416	8.19861	0.0219678	3.13039	0.38182	140.518	4.3466	15.2539	182.122	-827	140.518	4.3466	908.277	0.0519708	24.9788	1.66956	0.0905065	18.1146	303.864	9031.76
VL200-42.1	308.394	88.3018	44.9835	2.31392	0.0537461	3.09556	44.9835	2.31392	0.0537461	3.09556	0.164739	3.8648	0.0222304	2.31392	0.598717	140.879	3.2496	359.446	69.8559	61	140.879	3.2496	664.128	0.0260505	9.61992	1.10562	0.291665	9.75516	312.168	10520.5
VL200-18.1	312.138	88.9391	44.6828	2.31174	0.0502897	3.17212	44.6828	2.31174	0.0502897	3.17212	0.155182	3.92512	0.02238	2.31174	0.588962	142.435	3.28098	207.397	73.5653	32	142.435	3.28098	739.706	0.025072	4.39211	0.994221	0.304322	11.9858	264.618	9628.42
VL200-16.1	209.276	68.6141	44.4892	2.35075	0.0462977	4.1607	44.4892	2.35075	0.0462977	4.1607	0.143485	4.77885	0.0224774	2.35075	0.491907	143.764	3.37222	12.1032	100.061	-1096	143.764	3.37222	607.221	0.291234	8.80766	0.997174	0.189771	10.0222	235.73	10936.1
VL200-1.1	189.613	53.2358	42.1853	2.97525	0.0502999	3.93916	42.1853	2.97525	0.0502999	3.93916	0.164402	4.9365	0.023705	2.97525	0.602704	150.801	4.46767	207.864	91.3459	28	150.801	4.46767	401.826	0.126455	3.84495	0.60199	0.402973	5.86472	194.16	8746.36
VL200-27.1	76.7011	35.3486	41.0344	3.99093	0.0504583	12.4622	41.0344	3.99093	0.0504583	12.4622	0.169545	13.0857	0.0243698	3.99093	0.304985	154.966	6.25486	215.152	288.606	28	154.966	6.25486	439.374	0.0227458	9.32226	0.945633	0.569103	7.83669	204.557	9732.03
VL200-53.1	306.711	155.112	40.1517	2.30899	0.0514355	6.49251	40.1517	2.30899	0.0514355	6.49251	0.176629	6.89087	0.0249056	2.30899	0.33508	158.153	3.68177	259.397	149.155	39	158.153	3.68177	1737.92	0.0312378	9.48338	3.63604	1.18077	35.7496	625.073	8819.05
VL200-56.1	126.803	94.1165	40.1197	2.37303	0.0487264	4.0331	39.8589	2.41718	0.0539105	7.66595	0.186487	8.03801	0.0250885	2.41718	0.300718	158.813	3.75824	366.332	172.784	57	158.813	3.75824	893.612	0.0112697	39.2609	1.59608	0.542982	14.3257	385.494	10939.5
VL200-59.1	972.082	352.345	39.4422	3.33848	0.0478917	1.5986	39.4422	3.33848	0.0478917	1.5986	0.167417	3.70148	0.0253536	3.33848	0.901931	161.686	5.35556	92.8897	37.865	-75	161.686	5.35556	1556.76	0.133712	41.63	1.77437	0.337615	19.1074	762.492	10789.2
VL200-50.1	141.637	69.0793	39.364	2.38507	0.0471388	4.30119	39.0744	2.44118	0.0530187	8.66199	0.187085	8.99941	0.0255922	2.44118	0.27126	162.156	3.8572	328.609	196.543	51	162.156	3.8572	397.1	0.0236996	11.251	0.959488	0.234258	9.37755	146.462	9663.04
VL200-11.1	559.955	611.617	38.9447	2.27977	0.0514737	2.16363	38.9447	2.27977	0.0514737	2.16363	0.182238	3.14303	0.0256774	2.27977	0.725341	163.006	3.69222	261.101	49.6906	38	163.006	3.69222	1293.86	0.0789431	40.2549	5.46242	0.491708	36.7163	348.775	9589.25
VL200-8.1	757.176	436.893	38.7994	2.27037	0.0504504	1.88554	38.8289	2.27165	0.0498451	2.26371	0.176998	3.20698	0.025754	2.27165	0.708343	163.82	3.69338	186.765	52.6964	12	163.82	3.69338	621.521	0.0167711	30.0248	0.952633	0.433205	9.20384	291.166	11015.9
VL200-61.1	135.793	81.0403	38.6306	3.11886	0.0491426	3.7863	38.4041	3.1463	0.0538169	7.00737	0.193215	7.6813	0.0260389	3.1463	0.409605	164.798	5.11091	362.412	158.049	55	164.798	5.11091	1045.98	0.0436283	14.7322	2.54946	0.594823	21.6865	362.96	9130.2
VL200-52.1	571.35	404.349	38.4162	2.75656	0.0497091	2.11415	38.4522	2.75814	0.0489642	2.63326	0.175574	3.81332	0.0260063	2.75814	0.723291	165.593	4.53134	145.098	61.7709	-14	165.593	4.53134	1821.5	0.861664	24.8936	5.05341	1.5804	43.5617	631.525	8502.88
VL200-40.1	73.0762	32.7165	37.153	3.1529	0.0490384	5.68195	36.9132	3.21834	0.0541889	10.7381	0.202409	11.21	0.0270906	3.21834	0.287095	171.317	5.38715	377.928	241.533	55	171.317	5.38715	353.141	0.0301465	12.6926	0.653055	0.302242	6.53495	147.29	9977.07
VL200-15.1	102.421	63.1441	36.0369	2.45795	0.0510064	4.93545	36.4172	2.56878	0.0426046	15.3081	0.161306	15.5221	0.0274596	2.56878	0.165492	176.144	4.32615	-191.751	382.934	194	176.144	4.32615	483.615	0.0445393	11.3998	1.32248	0.415701	10.2038	192.737	8779.1
VL200-5.1	719.378	219.831	33.1318	3.29171	0.0803198	5.47941	33.1318	3.29171	0.0803198	5.47941	0.334256	6.39212	0.0301825	3.29171	0.514963	184.462	6.1058	1203.99	107.956	85	184.462	6.1058	948.477	0.0475556	28.5732	1.49183	0.567674	16.208	362.428	10893.6
VL200-24.1	276.252	141.46	33.3337	2.32105	0.0506964	2.86651	33.3926	2.32775	0.0492893	4.11118	0.203519	4.72443	0.0299468	2.32775	0.492705	190.364	4.38938	160.599	96.1644	-19	190.364	4.38938	649.293	0.0382051	13.44	1.98402	1.0253	15.25	269.104	10306.9
VL200-46.1	227.694	108.179	32.7571	2.33457	0.0524787	3.07308	32.7571	2.33457	0.0524787	3.07308	0.220891	3.85929	0.0305277	2.33457	0.604924	193.253	4.48439	305.334	70.0191	37	193.253	4.48439	615.316	0.0387358	16.936	1.66443	0.699823	13.7352	241.989	10343.4
VL200-26.1	179.582	65.5277	4.64256	2.35892	0.0836308	1.05495	4.64557	2.35936	0.0830805	1.16141	2.46582	2.62973	0.215259	2.35936	0.897189	1255.96	28.5666	1270.26	22.6659	1	1270.26	22.6659	1833.18	0.0606297	43.1089	4.30909	0.535393	39.3995	526.993	7895.33
VL200-22.1	149.096	74.7011	4.62377	2.38828	0.0833933	1.21085	4.6218	2.38866	0.0837538	1.27965	2.49859	2.70984	0.216366	2.38866	0.881479	1261.21	29.0518	1285.99	24.9176	2	1285.99	24.9176	1715.31	0.155457	5.54157	10.9519	2.41175	72.1943	404.718	7300.34
VL200-7.1	104.896	68.639	4.26145	2.44025	0.0945796	1.26256	4.28559	2.44623	0.0897961	2.09726	2.889	3.22219	0.23334	2.44623	0.759181	1347.17	31.7435	1420.36	40.0819	5	1420.36	40.0819	830.54	0.0476603	19.8339	1.52994	0.511113	16.144	290.657	10047.7
VL200-55.1	18.2463	14.2016	2.73257	3.20777	0.128355	4.30076	2.72786	3.21238	0.129859	4.39837	6.56375	5.44657	0.366587	3.21238	0.5898	1999.88	65.0207	2095.3	77.2854	5	2095.3	77.2854	661.973	0.0249982	13.5368	2.56557	0.508889	18.1695	199.371	9558.64

## Sheet: CA01
			Total				204Pb-corrected									207Pb-corrected		204Pb-corrected			Preferred Age
Spot Name	U (ppm)	Th (ppm)	238U/206Pb	% err	207Pb/206Pb	% err	238U/206Pb*	% err	207Pb*/206Pb*	% err	207Pb*/235U	% err	206Pb*/238U	% err	err corr	206Pb/238U Age (Ma)	± 1s	206Pb/207Pb Age (Ma)	± 1s	% discordant	Age (Ma)	± 1s	Y (ppm)	La (ppm)	Ce (ppm)	Sm (ppm)	Eu (ppm)	Gd (ppm)	Yb (ppm)	Hf (ppm)
CA01-2.1	696.418	247.585	82.2508	2.35223	0.037671	8.10616	82.2508	2.35223	0.037671	8.10616	0.0631493	8.44055	0.0121579	2.35223	0.278682	78.8726	1.87161	-509.527	216.238	115.998	78.8726	1.87161	359.728	0.073237	14.4395	0.682108	0.210915	5.59113	121.521	11407.8
CA01-70.1	340.663	375.02	76.5067	2.85906	0.0476436	4.03506	76.5067	2.85906	0.0476436	4.03506	0.085863	4.94529	0.0130708	2.85906	0.578137	83.7202	2.3917	80.5743	95.7962	-3.92147	83.7202	2.3917	1859.82	0.109287	40.9737	9.84514	3.7841	68.5197	515.189	8427.43
CA01-62.1	347.204	111.013	75.9835	2.92383	0.0467124	4.37627	75.9835	2.92383	0.0467124	4.37627	0.0847645	5.26313	0.0131607	2.92383	0.555532	84.3926	2.46614	33.505	104.82	-152.558	84.3926	2.46614	455.114	0.0267609	12.0069	1.12408	0.550449	10.2658	165.423	9121.39
CA01-26.1	125.262	76.9485	74.758	4.45025	0.0503755	6.46696	77.4107	4.79149	0.0223141	66.9	0.0397447	67.0714	0.0129181	4.79149	0.0714386	85.3762	3.79871				85.3762	3.79871	591.252	0.0334711	13.1915	2.14886	1.04601	16.4319	205.832	9428.19
CA01-7.1	597.881	325.375	74.3558	2.53315	0.0534861	3.12118	74.5157	2.54227	0.0517914	4.60316	0.0958321	5.25854	0.01342	2.54227	0.483455	85.4998	2.16371	275.214	105.449	69.2322	85.4998	2.16371	1531.96	0.0347657	24.6054	4.45737	0.692165	38.3253	459.849	10004.9
CA01-1.1	557.457	185.439	70.998	2.58365	0.0557961	13.759	70.998	2.58365	0.0557961	13.759	0.108358	13.9994	0.0140849	2.58365	0.184554	89.2636	2.45423	443.297	305.965	80.2139	89.2636	2.45423	739.339	0.0783562	15.9182	0.799004	0.54934	10.6039	218.117	11298.4
CA01-47.1	594.692	384.57	71.5619	2.61889	0.046246	2.99261	71.3114	2.63056	0.0490297	4.89079	0.0947985	5.55335	0.014023	2.63056	0.47369	89.6349	2.34164	148.229	114.661	39.713	89.6349	2.34164	712.553	0.102624	34.1438	2.269	1.00396	17.5098	267.667	10166.3
CA01-25.1	177.769	91.805	70.5239	2.37362	0.0553778	5.06814	71.3524	2.51486	0.0461431	15.5884	0.0891659	15.7899	0.0140149	2.51486	0.15927	89.9084	2.14799	4.05204	375.458	-2128.94	89.9084	2.14799	988.738	0.0382186	7.92809	3.74876	0.88537	30.6357	290.173	9168.4
CA01-18.1	670.036	180.498	70.7542	2.27623	0.0496755	2.79289	70.7542	2.27623	0.0496755	2.79289	0.0968036	3.60297	0.0141334	2.27623	0.631763	90.2642	2.05101	178.825	65.1098	49.7542	90.2642	2.05101	340.894	0.0258975	11.1656	0.587818	0.118963	4.61763	163.368	12426.8
CA01-15.1	1371	934.913	70.4711	2.32501	0.0488574	2.01192	70.9514	2.33747	0.0434542	4.97844	0.0844445	5.49987	0.0140942	2.33747	0.425004	90.7184	2.10223	-142.6	123.343	164.422	90.7184	2.10223	2860.49	0.120663	72.0246	7.83351	3.35876	70.7778	835.188	10345.6
CA01-24.1	561.631	304.051	70.2571	2.28333	0.0506938	3.05065	71.2507	2.34511	0.0395087	11.5588	0.0764548	11.7943	0.0140349	2.34511	0.198835	90.7836	2.07064	-384.106	300.494	124.263	90.7836	2.07064	807.488	0.0974151	19.8118	2.87183	1.1086	20.4291	282.299	10410.8
CA01-28.1	532.434	396.356	69.1509	3.03137	0.0491955	3.19147	69.5954	3.05401	0.0441017	7.60895	0.0873727	8.19897	0.0143688	3.05401	0.372487	92.4026	2.79355	-106.085	187.181	188.034	92.4026	2.79355	1412.92	0.118914	31.4964	8.29182	4.16085	49.7749	445.888	8616.28
CA01-36.1	324.853	131.56	68.7404	2.66368	0.0463649	8.91624	69.18	2.70181	0.041278	13.3612	0.0822696	13.6317	0.014455	2.70181	0.198201	93.2823	2.51932	-271.509	339.559	135.048	93.2823	2.51932	377.335	0.029577	18.2055	0.748279	0.279924	7.52208	151.46	10451.2
CA01-56.1	319.598	68.1902	68.5337	4.41665	0.0472766	3.83364	68.5337	4.41665	0.0472766	3.83364	0.0951138	5.84839	0.0145914	4.41665	0.755191	93.4555	4.11301	62.185	91.3286	-50.5332	93.4555	4.11301	738.118	0.0294983	2.33572	1.20478	0.134496	13.2267	284.605	11207.9
CA01-17.1	377.127	260.355	68.4633	2.3031	0.0481086	3.68382	68.6522	2.31957	0.0459194	6.15097	0.0922238	6.5738	0.0145662	2.31957	0.35285	93.4536	2.15191	-7.66337	148.481	1326.03	93.4536	2.15191	1826.89	0.0705976	17.3623	9.07319	2.18255	64.1345	479.68	8771.1
CA01-14.1	636.153	274.879	68.5718	2.39324	0.0459092	2.82244	68.6777	2.39822	0.0446804	4.00289	0.0897021	4.66633	0.0145608	2.39822	0.513942	93.5638	2.23346	-74.1106	97.8651	227.384	93.5638	2.23346	2421.98	0.0580772	11.7403	8.51284	1.42335	74.5952	657.833	9258.68
CA01-64.1	1564.37	503.165	68.2594	2.25605	0.0482727	1.88338	68.2594	2.25605	0.0482727	1.88338	0.0975079	2.93886	0.01465	2.25605	0.767662	93.7121	2.1066	111.627	44.4551	16.1274	93.7121	2.1066	2154.31	0.0878477	21.8687	4.7748	0.108935	52.8933	586.921	10870.7
CA01-55.1	1522.17	478.152	67.3772	2.31627	0.0585136	3.763	68.1005	2.33116	0.0501054	6.08268	0.101446	6.51408	0.0146842	2.33116	0.357864	93.7138	2.17594	198.875	141.284	53.1325	93.7138	2.17594	1804	1.45208	45.177	5.33695	1.55135	34.8991	624.853	11589.7
CA01-33.1	743.202	356.683	67.5532	2.27202	0.0491111	2.52518	67.6436	2.27596	0.0480505	3.40072	0.0979428	4.09205	0.0147834	2.27596	0.556191	94.5875	2.14354	100.726	80.4331	6.12437	94.5875	2.14354	1176.84	0.0455019	20.8126	3.57133	0.659139	25.8322	447.25	11236.7
CA01-22.1	1346.37	789.66	67.4276	2.25625	0.0479877	1.71894	67.4276	2.25625	0.0479877	1.71894	0.098128	2.83645	0.0148307	2.25625	0.79545	94.8963	2.1328	97.6322	40.6795	2.81607	94.8963	2.1328	2414.52	0.117779	49.9445	12.7128	3.77842	82.9874	693.26	10237.2
CA01-71.1	747.608	316.2	67.3236	2.54089	0.0488375	2.59299	67.4188	2.54481	0.047717	3.54862	0.0975874	4.36678	0.0148327	2.54481	0.582767	94.941	2.40517	84.2291	84.19	-12.7808	94.941	2.40517	466.737	0.0348295	17.7947	0.774709	0.328801	7.6165	203.604	10401.4
CA01-19.1	576.092	228.855	67.2075	2.40559	0.0497841	6.58385	67.5758	2.42631	0.0454437	9.12934	0.0927223	9.44626	0.0147982	2.42631	0.256854	94.9913	2.30722	-32.8602	221.44	391.048	94.9913	2.30722	899.74	0.112904	16.4123	1.94747	0.269515	17.9165	308.867	10871.3
CA01-37.1	695.653	368.188	66.3614	2.62795	0.0500466	2.60272	66.6483	2.63978	0.0466231	5.09956	0.0964526	5.7423	0.0150041	2.63978	0.459709	96.1647	2.51945	28.9228	122.25	-233.668	96.1647	2.51945	859.989	0.0517253	30.479	1.96645	0.65569	17.0872	326.7	9934.65
CA01-8.1	78.9826	32.5642	65.651	2.54832	0.0537315	7.90021	67.5295	3.25481	0.0311782	54.4837	0.0636588	54.5809	0.0148083	3.25481	0.0596329	96.7499	2.50729	-1043.42	1630.93	109.909	96.7499	2.50729	903.552	0.0311056	6.15401	1.88311	0.299148	19.6226	281.263	10588.5
CA01-13.1	754.445	318.717	65.683	3.17658	0.0489522	7.52292	65.683	3.17658	0.0489522	7.52292	0.102759	8.16609	0.0152246	3.17658	0.388997	97.2865	3.10744	144.519	176.491	32.8473	97.2865	3.10744	1050.01	0.0499807	28.9303	3.47289	1.18032	26.8592	355.469	11160.7
CA01-43.1	555.355	242.845	65.8012	2.28018	0.0471068	2.90709	66.1416	2.29966	0.0429947	6.40833	0.0896276	6.80846	0.0151191	2.29966	0.337766	97.3374	2.21454	-169.004	159.591	158.429	97.3374	2.21454	991.102	0.0305995	29.6511	2.52598	0.910967	22.501	325.557	10795.5
CA01-52.1	159.488	71.1484	65.2923	2.38396	0.0479985	5.32219	65.2923	2.38396	0.0479985	5.32219	0.10136	5.83172	0.0153157	2.38396	0.408792	97.9827	2.34505	98.1652	125.94	0.186808	97.9827	2.34505	514.876	0.0280314	13.7133	1.59972	0.544945	13.866	170.009	10711.7
CA01-72.1	364.567	313.015	65.2124	3.35803	0.0474685	3.62657	65.56	3.37911	0.043234	8.0321	0.0909261	8.71395	0.0152532	3.37911	0.387782	98.1673	3.28649	-155.198	199.489	164.123	98.1673	3.28649	2276.04	0.210346	28.4417	15.1122	3.94552	86.7559	679.674	6887.14
CA01-42.1	813.779	483.995	64.731	2.26812	0.0509808	2.31946	64.8805	2.274	0.0491538	3.57133	0.104459	4.23385	0.015413	2.274	0.537099	98.4587	2.22656	154.154	83.6361	36.3135	98.4587	2.22656	2553.48	0.0518341	19.3032	9.32932	1.63853	72.3638	769.378	10036.6
CA01-11.1	324.408	108.268	64.1957	3.49325	0.0462955	3.8088	64.3783	3.50482	0.0440311	6.53693	0.0943021	7.41722	0.0155332	3.50482	0.472525	99.8604	3.47726	-110.025	160.932	191.789	99.8604	3.47726	1017.03	0.0385645	10.45	1.99795	0.196401	20.2944	330.555	12464.1
CA01-5.1	117.711	45.898	63.2041	4.29804	0.0536427	6.20721	64.2832	4.46454	0.0401791	25.5407	0.0861794	25.928	0.0155562	4.46454	0.17219	100.488	4.31715	-340.56	658.147	130.231	100.488	4.31715	499.721	0.0369436	17.2053	0.838947	0.546054	7.73382	219.156	9925.88
CA01-49.1	252.774	134.909	63.6221	2.65473	0.0467831	4.20479	63.8451	2.67777	0.0439953	7.78309	0.0950122	8.23085	0.0156629	2.67777	0.325333	100.695	2.67071	-112.031	191.686	190.912	100.695	2.67071	1685.73	0.0913332	12.846	4.0713	0.504272	39.4812	485.358	10668.6
CA01-35.1	672.743	360.574	63.4342	2.2757	0.0491457	2.66649	63.8104	2.29494	0.0444429	6.09375	0.0960311	6.51157	0.0156714	2.29494	0.35244	100.693	2.28549	-87.1613	149.359	216.691	100.693	2.28549	1255.15	0.0291466	13.1303	2.30434	0.300206	24.4409	423.117	11156.1
CA01-41.1	653.742	206.43	62.7202	2.47147	0.0488351	2.67327	62.5338	2.48038	0.0511927	4.12408	0.112874	4.81252	0.0159914	2.48038	0.515403	101.873	2.50999	248.514	94.9306	59.3132	101.873	2.50999	309.137	0.0263049	8.29386	0.520174	0.126159	4.57981	143.707	12974.8
CA01-58.1	346.037	138.249	61.6815	2.30437	0.049711	9.44509	61.6815	2.30437	0.049711	9.44509	0.111122	9.72213	0.0162123	2.30437	0.237023	103.465	2.44852	180.487	220.124	42.9015	103.465	2.44852	1036.86	0.0153093	10.0631	1.87959	0.194793	19.8216	337.85	11012.2
CA01-68.1	168.605	64.5816	61.6331	2.37578	0.0490601	5.10957	61.9667	2.43668	0.044766	11.1686	0.0996073	11.4313	0.0161377	2.43668	0.213158	103.631	2.47037	-69.4368	272.811	250.628	103.631	2.47037	390.735	0.0227241	7.94537	0.647417	0.201226	6.84247	146.131	10968.8
CA01-69.1	996.269	427.397	60.4272	2.37764	0.0490372	2.0819	60.4818	2.37936	0.0483197	2.58475	0.110154	3.51316	0.0165339	2.37936	0.677272	105.691	2.50283	113.926	60.984	7.26838	105.691	2.50283	1805.03	0.0322837	30.8065	5.08677	1.38908	48.3238	534.403	10633.4
CA01-57.1	388.531	271.626	59.6918	2.55804	0.0496352	3.23756	60.3496	2.60511	0.0408968	10.4484	0.0934365	10.7683	0.0165701	2.60511	0.241924	106.905	2.72806	-295.143	266.792	137.027	106.905	2.72806	3336.06	0.0579573	14.9379	7.63042	1.29477	82.8619	847.492	9661.36
CA01-10.1	277.785	137.659	59.5452	2.32477	0.0494807	3.89041	59.5452	2.32477	0.0494807	3.89041	0.114575	4.53209	0.016794	2.32477	0.512958	107.188	2.4915	169.658	90.8488	37.0246	107.188	2.4915	976.144	0.15098	11.3867	2.14523	0.590504	21.1526	316.338	9235.56
CA01-30.1	261.579	132.27	59.2813	4.3566	0.0497537	4.10106	59.7022	4.38544	0.0441245	10.2107	0.101904	11.1126	0.0167498	4.38544	0.394637	107.625	4.67079	-104.812	251.122	203.859	107.625	4.67079	818.218	0.0313853	21.4586	1.92965	0.999924	17.4589	308.298	9289.65
CA01-73.1	974.266	488.62	57.6289	2.26367	0.061242	12.8842	58.5515	2.29493	0.0487308	17.5636	0.114754	17.7129	0.017079	2.29493	0.129563	109.099	2.68889	133.875	412.861	18.6113	109.099	2.68889	746.047	0.848236	38.2823	3.34403	1.59842	20.5659	242.15	10657.1
CA01-75.1	964.868	220.451	57.2858	2.53075	0.0486204	2.00696	57.2858	2.53075	0.0486204	2.00696	0.117024	3.22996	0.0174563	2.53075	0.783526	111.511	2.80909	128.542	47.2236	13.3262	111.511	2.80909	909.369	0.0436553	19.0984	1.43967	0.517462	17.8445	269.899	12594.7
CA01-3.1	340.201	128.105	56.6723	2.31269	0.0511199	3.5232	56.9779	2.34392	0.0468501	7.5452	0.113372	7.90089	0.0175507	2.34392	0.296665	112.359	2.59586	40.5523	180.482	-178.119	112.359	2.59586	963.6	0.177065	11.3791	1.3275	0.167746	16.7935	340.467	11120.1
CA01-31.1	159.029	64.5198	57.051	3.57486	0.0454569	12.4635	56.7459	3.61466	0.0497224	14.1872	0.120815	14.6404	0.0176224	3.61466	0.246896	112.411	4.07328	181.025	330.608	38.1223	112.411	4.07328	559.162	0.0215385	11.6052	0.919232	0.222066	10.96	179.803	12183.1
CA01-39.1	65.6361	20.3894	56.462	5.21868	0.0473444	16.7585	56.462	5.21868	0.0473444	16.7585	0.115615	17.5523	0.017711	5.21868	0.297322	113.309	5.98494	65.5955	398.981	-73.1714	113.309	5.98494	708.537	0.032788	10.1992	0.97078	0.713481	8.02157	353.681	8659.98
CA01-63.1	465.84	311.785	55.9409	2.52974	0.0500783	3.08764	56.0515	2.53746	0.0485095	4.55	0.119327	5.20972	0.0178407	2.53746	0.487063	113.968	2.8746	123.165	107.168	7.5117	113.968	2.8746	1379.41	0.0302977	17.241	3.31992	0.616618	31.9994	394.007	9335.5
CA01-9.1	916.388	519.529	52.3369	20.3957	0.088946	106.671	53.9388	22.1673	0.0658604	180.41	0.168354	181.766	0.0185395	22.1673	0.121955	115.835	27.5914	801.029	3779.48	85.9878			834.532	0.476468	30.0812	2.21266	0.586204	17.7061	308.471	10222.1
CA01-34.1	89.5743	34.3765	50.2454	5.12546	0.0451975	6.5816	50.2454	5.12546	0.0451975	6.5816	0.124028	8.34193	0.0199023	5.12546	0.614422	127.577	6.51305	-46.053	160.046	379.585	127.577	6.51305	498.516	0.0233381	10.6745	1.07601	0.440907	11.1699	193.812	10346.5
CA01-21.1	122.13	65.2364	47.3015	3.46506	0.0513388	5.26203	47.3015	3.46506	0.0513388	5.26203	0.149648	6.30044	0.021141	3.46506	0.549971	134.427	4.64809	255.072	120.981	47.6206	134.427	4.64809	503.95	0.0199214	15.0371	2.00667	0.522621	13.3284	166.665	9910.88
CA01-51.1	157.222	102.98	47.3584	2.37936	0.047037	4.66095	47.3584	2.37936	0.047037	4.66095	0.136944	5.23315	0.0211156	2.37936	0.454671	134.99	3.21084	50.0677	111.291	-170.817	134.99	3.21084	1147.46	0.04068	17.9558	5.94476	1.23918	39.7773	308.803	9713.59
CA01-66.1	74.9495	51.0043	46.9466	3.28427	0.0426894	7.02282	47.3792	3.41115	0.0353003	22.8022	0.102729	23.0559	0.0211063	3.41115	0.147951	136.903	4.49348	-686.142	631.296	120.904	136.903	4.49348	866.933	0.0348366	13.9965	3.17055	0.774686	25.312	261.35	8398.91
CA01-16.1	109.564	30.6435	46.8447	3.86002	0.0424563	6.06655	46.2672	3.9573	0.0523454	14.0647	0.155993	14.6108	0.0216136	3.9573	0.270847	137.238	5.27824	299.534	320.791	54.5568	137.238	5.27824	1097.3	0.0285602	12.8572	1.35345	0.969588	18.477	432.527	9182.78
CA01-29.1	35.3662	9.82774	44.6562	2.83032	0.0622781	8.5088	44.6562	2.83032	0.0622781	8.5088	0.192289	8.96719	0.0223933	2.83032	0.315631	140.384	4.05604	682.743	181.709	79.9563	140.384	4.05604	539.435	0.0334905	4.95832	0.894641	0.375012	7.88419	284.94	9525.81
CA01-61.1	724.351	489.332	44.8641	2.27353	0.0495201	2.13254	44.9497	2.27753	0.0480028	3.14221	0.147245	3.8808	0.0222471	2.27753	0.586871	142	3.21036	98.3752	74.3515	-44.6731	142	3.21036	2453.81	0.115727	106.712	3.54586	1.25375	39.2214	965.175	9319.84
CA01-46.1	270.196	71.17	43.5102	2.82493	0.0496496	3.33152	43.8151	2.85376	0.0440753	8.26861	0.138699	8.74721	0.0228232	2.85376	0.326247	146.362	4.11471	-107.556	203.467	237.935	146.362	4.11471	1254.66	0.0559645	8.71123	1.45408	0.524284	15.587	547.338	8075.53
CA01-60.1	271.814	146.874	43.3583	4.41786	0.0474381	3.45331	43.1525	4.4306	0.0512261	6.10065	0.163677	7.53977	0.0231736	4.4306	0.587631	147.276	6.46433	250.015	140.39	41.4	147.276	6.46433	1116.56	0.00906186	22.6484	2.80582	0.400021	23.8137	357.014	11631
CA01-65.1	1725.94	1388.93	41.9447	2.33252	0.0506704	1.26615	41.9447	2.33252	0.0506704	1.26615	0.166563	2.65401	0.0238409	2.33252	0.878865	151.589	3.51052	224.858	29.2703	32.8361	151.589	3.51052	11279	0.0957326	89.4469	10.5008	1.85445	126.136	5058.49	10568
CA01-48.1	155.455	113.48	40.3911	3.34092	0.052929	4.10299	40.6922	3.38226	0.0470176	10.0948	0.159313	10.6463	0.0245747	3.38226	0.317693	156.93	5.21831	49.0816	241.08	-221.539	156.93	5.21831	1045.66	0.0276102	16.752	3.86763	0.880857	29.0293	341.881	10355.9
CA01-6.1	356.107	128.369	40.1293	2.5264	0.0490958	2.85879	40.2649	2.53766	0.0464046	5.11317	0.158904	5.70826	0.0248355	2.53766	0.44456	158.702	3.98662	17.6456	122.838	-806.067	158.702	3.98662	760.791	0.041414	15.5072	1.90346	0.747852	16.3948	317.494	9060.39
CA01-74.1	719.646	342.733	39.1906	2.27253	0.0505741	1.92238	39.1906	2.27253	0.0505741	1.92238	0.177929	2.97656	0.0255163	2.27253	0.763474	162.173	3.66024	220.457	44.4763	26.6559	162.173	3.66024	1022.23	0.0834782	34.1421	1.98602	0.589528	19.3552	418.863	11046.6
CA01-54.1	89.9865	35.7583	38.1701	2.48894	0.046268	5.78915	38.1701	2.48894	0.046268	5.78915	0.167132	6.30152	0.0261985	2.48894	0.394975	167.365	4.16729	10.5625	139.264	-1497.61	167.365	4.16729	561.436	0.0222325	15.8244	0.844323	0.451976	8.09516	265.732	9674.46
CA01-40.1	295.999	204.417	36.9908	3.4912	0.0501977	2.96146	37.0594	3.49613	0.0487196	4.31105	0.181262	5.5505	0.0269837	3.49613	0.629876	171.814	5.95445	133.334	101.349	-29.1159	171.814	5.95445	548.542	3.64691	26.5153	1.13558	0.53875	8.59486	277.666	10177.8
CA01-59.1	148.738	44.8264	36.2991	2.78801	0.0481589	4.27284	36.2991	2.78801	0.0481589	4.27284	0.182929	5.10198	0.0275489	2.78801	0.546457	175.503	4.87006	106.055	100.96	-66.0787	175.503	4.87006	265.979	0.0400409	7.08193	0.363813	0.18376	3.76637	150.984	9512.24
CA01-38.1	334.883	211.385	36.0799	2.65292	0.0501582	2.65977	36.1339	2.65714	0.0489648	3.66123	0.18684	4.52383	0.0276748	2.65714	0.587366	176.122	4.63978	145.125	85.8844	-21.5522	176.122	4.63978	828.012	0.0483556	28.8173	1.56945	0.511797	15.2462	365.592	11204.3
CA01-27.1	163.157	91.7784	34.8681	2.37673	0.0512662	3.82353	35.198	2.43872	0.0437324	11.0148	0.171311	11.2815	0.0284107	2.43872	0.216169	181.935	4.30714	-126.81	272.058	245.851	181.935	4.30714	1021.28	0.090578	17.2749	5.1095	1.28096	31.2959	318.476	9439.79
CA01-53.1	460.225	318.415	34.3058	2.29007	0.0498844	2.235	34.3058	2.29007	0.0498844	2.235	0.200493	3.19994	0.0291496	2.29007	0.715659	185.207	4.2094	188.599	52.0107	1.81562	185.207	4.2094	1948.31	0.048032	23.1283	4.90442	1.25804	42.2189	616.546	9708
CA01-45.1	136.291	42.778	32.5362	2.40624	0.0504147	4.15506	33.146	2.54819	0.0354573	20.1484	0.147495	20.3089	0.0301696	2.54819	0.125471	195.053	4.67477	-673.876	556.369	130.395			220.487	0.124986	6.72317	0.381926	0.288681	3.24494	113.142	11327
CA01-44.1	237.99	128.952	29.6341	2.67767	0.0499759	6.63224	29.7433	2.69032	0.0470286	8.35618	0.218009	8.77858	0.033621	2.69032	0.306464	214.065	5.73786	49.6416	199.538	-334.921			507.555	0.0252693	20.0631	0.766063	0.376276	7.46296	231.989	10882.6
CA01-12.1	475.748	155.265	20.1631	2.63771	0.0531523	1.78528	20.149	2.63864	0.0537149	2.05235	0.367572	3.34284	0.0496302	2.63864	0.789341	311.839	8.1087	358.135	46.3252	13.1243	311.839	8.1087	179.951	0.0598541	5.22032	0.287122	0.141679	2.17013	100.576	11803.8
CA01-67.1	620.277	86.8291	4.28472	2.49482	0.0877733	0.57383	4.286	2.49488	0.0875188	0.599681	2.81546	2.56594	0.233318	2.49488	0.972307	1350.53	32.4902	1371.1	11.5388	1.55558	1371.1	11.5388	2082.8	0.0360658	4.05561	1.74169	0.0901747	25.7166	762.45	12631.4
CA01-50.1	1541.53	20.6113	4.23444	2.25527	0.0879224	1.2085	4.23459	2.25527	0.0878913	1.20949	2.86178	2.55912	0.23615	2.25527	0.881267	1365.77	29.7445	1379.27	23.2461	1.01539	1379.27	23.2461	1158.73	0.0205275	0.507794	0.569479	0.0430504	9.7096	821.621	13300.2
CA01-32.1	288.089	160.047	3.40837	2.54383	0.107416	0.676486	3.4089	2.54388	0.107282	0.688814	4.33926	2.63549	0.29335	2.54388	0.965241	1648.22	40.7604	1752.96	12.6049	6.12594	1752.96	12.6049	717.288	0.0570907	26.4415	2.74534	0.688408	19.1852	226.085	9702.61
CA01-23.1	300.06	147.839	3.18688	2.66671	0.109515	0.655157	3.18734	2.66675	0.109389	0.665915	4.73204	2.74863	0.313741	2.66675	0.970209	1755.64	45.7498	1788.48	12.1323	1.87708	1788.48	12.1323	1044.5	0.0426105	6.50768	3.4928	0.135874	29.2447	302.17	11664
CA01-4.1	195.158	130.486	2.20459	2.36565	0.198023	1.66501	2.20582	2.36581	0.197555	1.6741	12.3486	2.89822	0.453345	2.36581	0.816299	2290.63	56.6289	2805.39	27.3741	16.8557	2805.39	27.3741	550.622	0.0500402	46.702	1.44492	0.330625	13.7766	187.407	9995.34
CA01-20.1	259.809	130.623	2.08042	2.33138	0.171048	0.474904	2.0812	2.33146	0.170713	0.485999	11.3098	2.38157	0.480491	2.33146	0.978957	2518.74	63.2858	2563.92	8.12937	1.62721	2563.92	8.12937	828.983	0.0408122	27.3044	2.58791	0.751544	21.2013	265.878	10510.9
